# Supplementary material
Source: PubMed Central journal article supplement (PMC1796916)

### 3prime:A

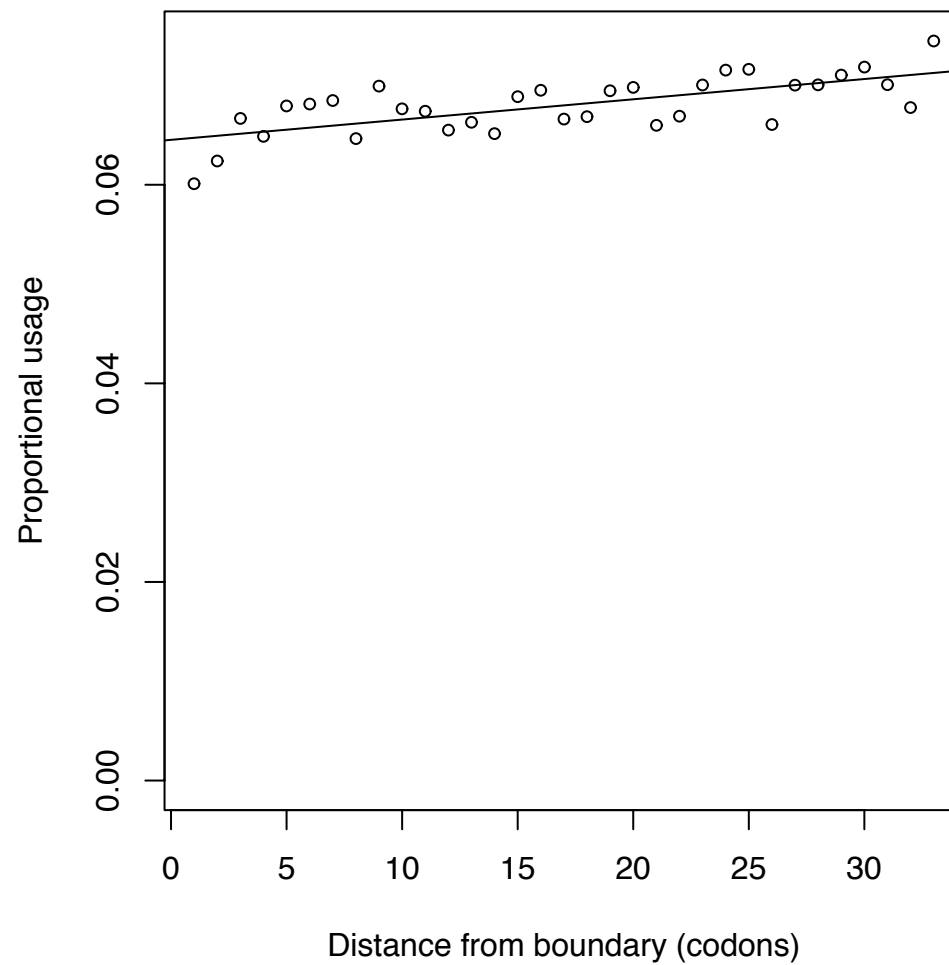

### 3prime:C

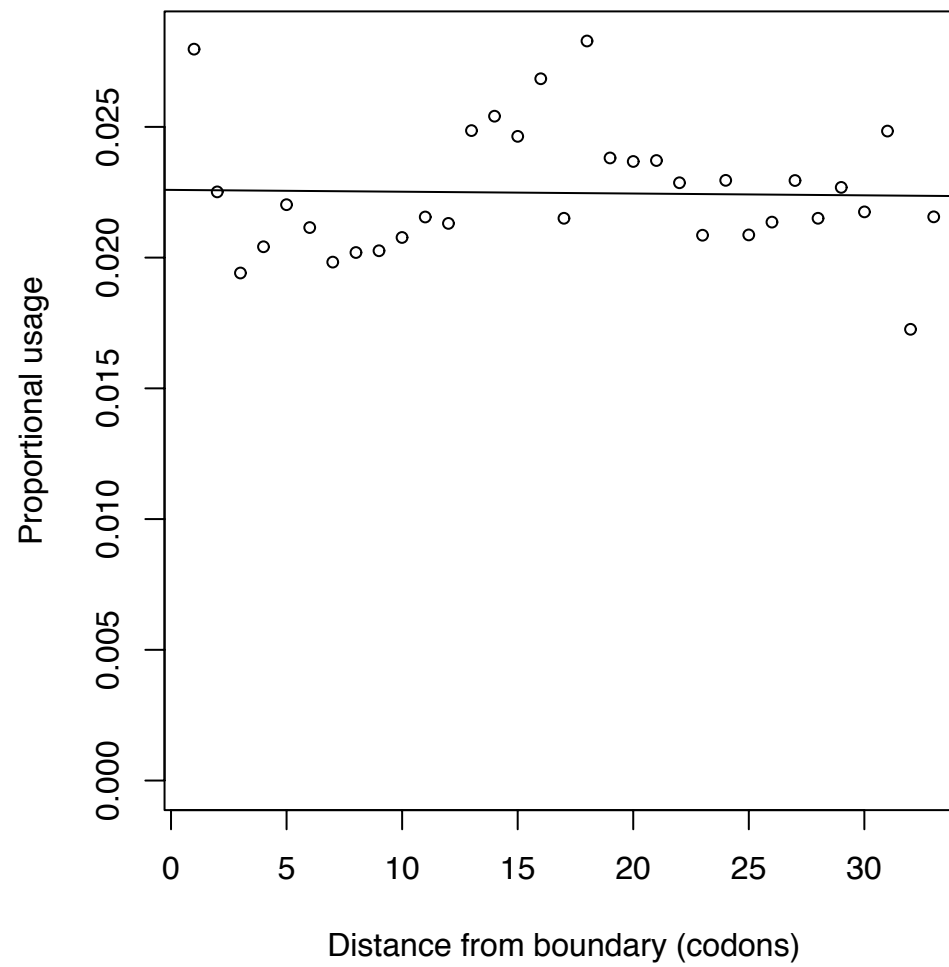

### 3prime:D

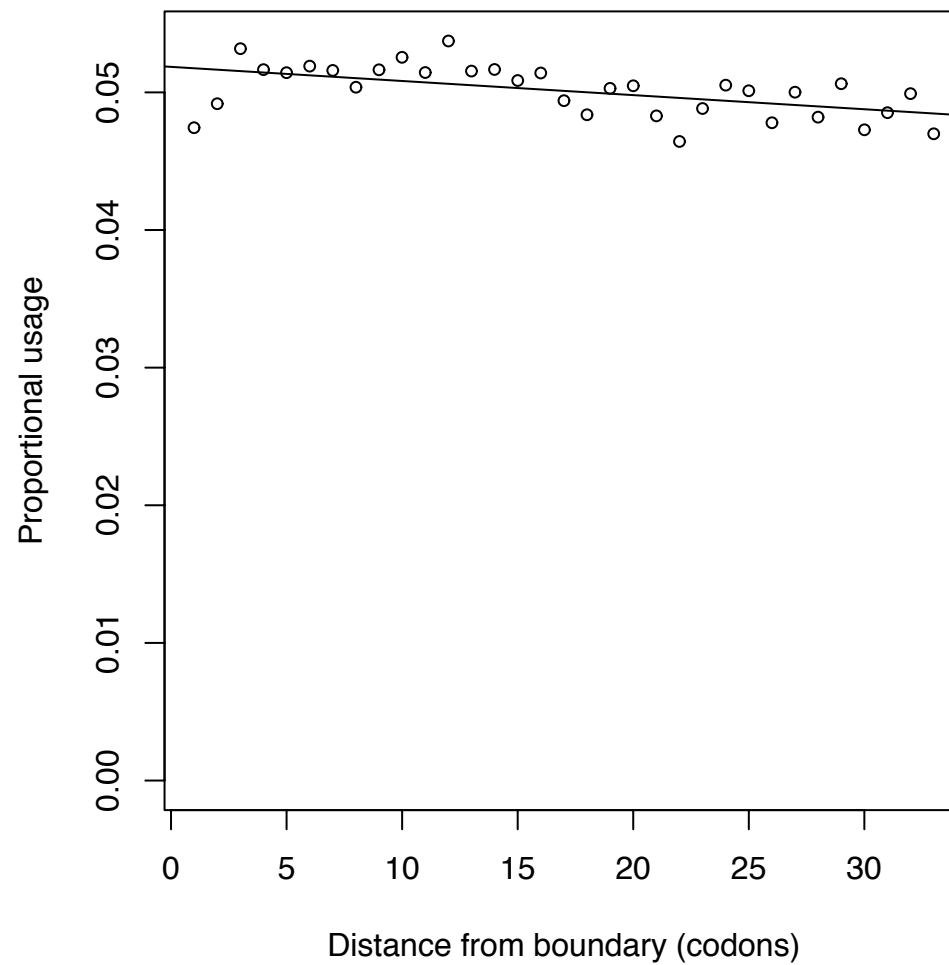

### 3prime:E

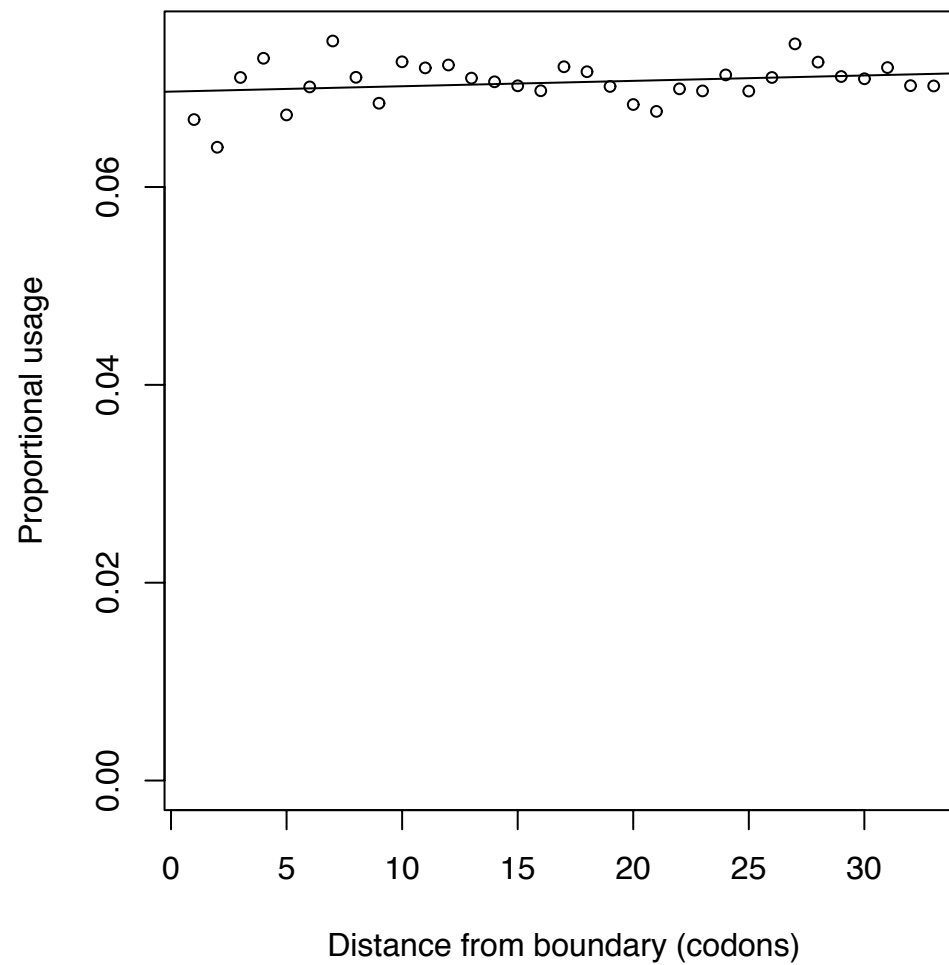

### 3prime:F

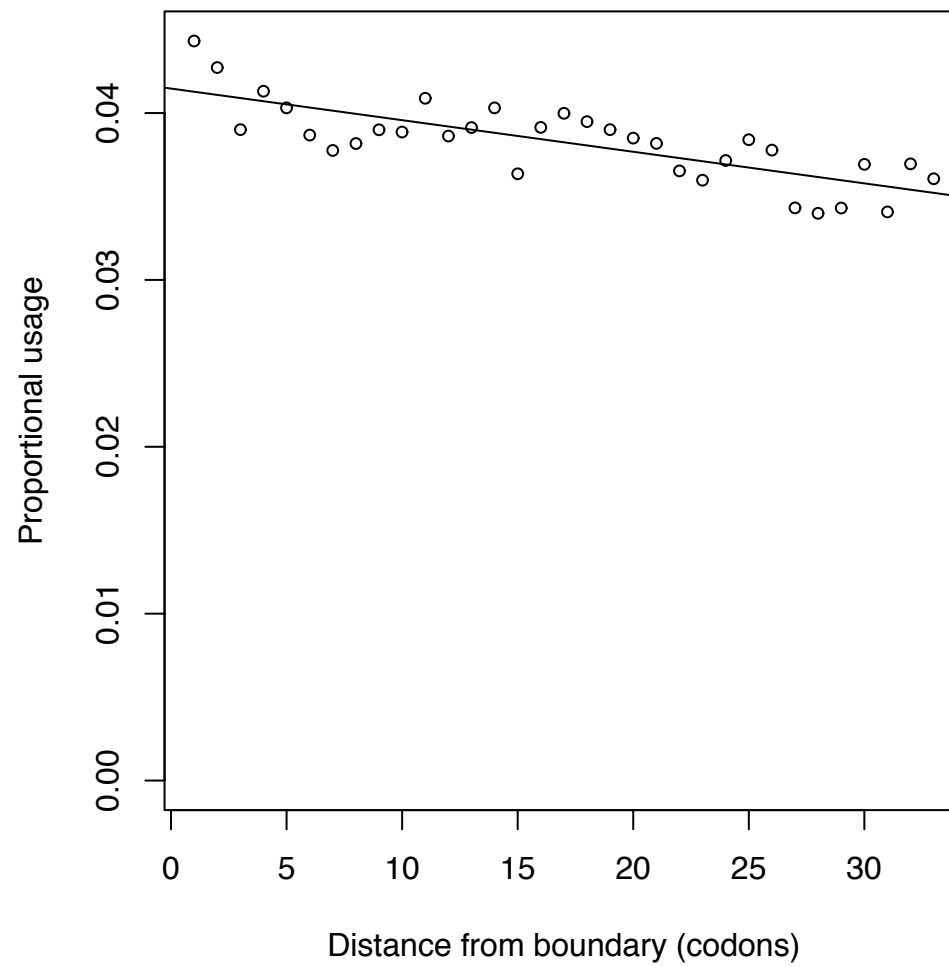

### 3prime:G

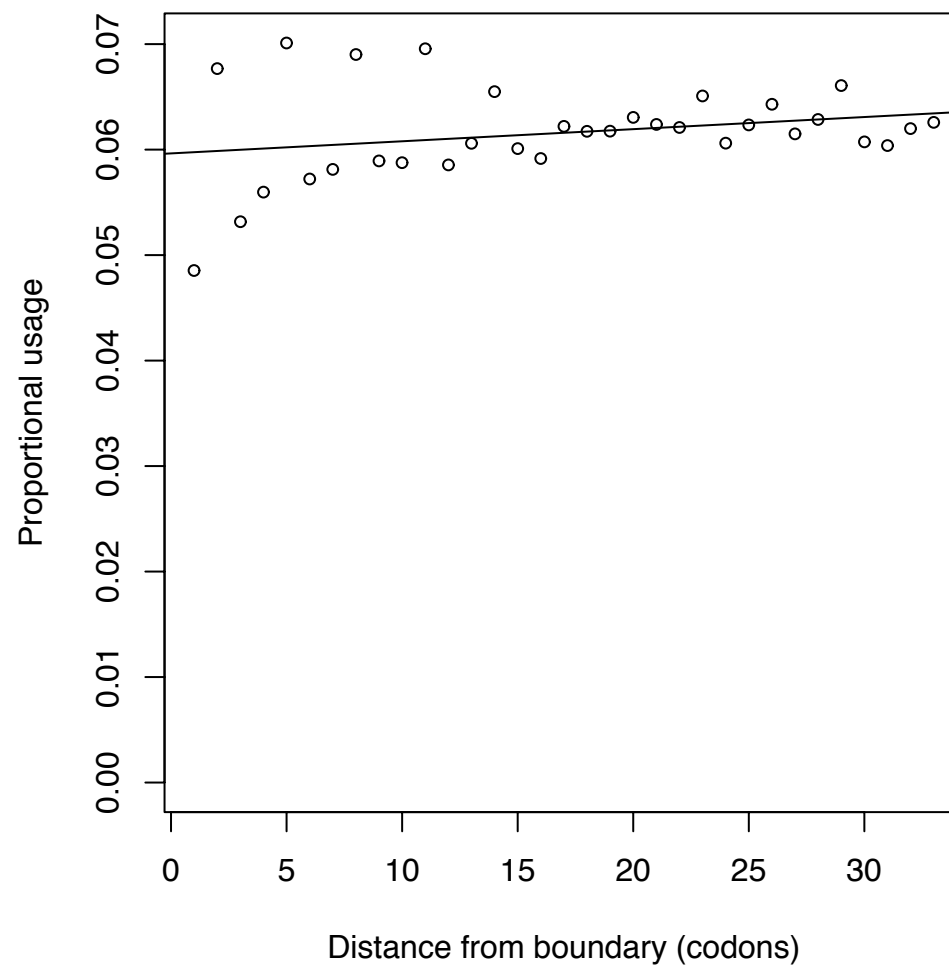

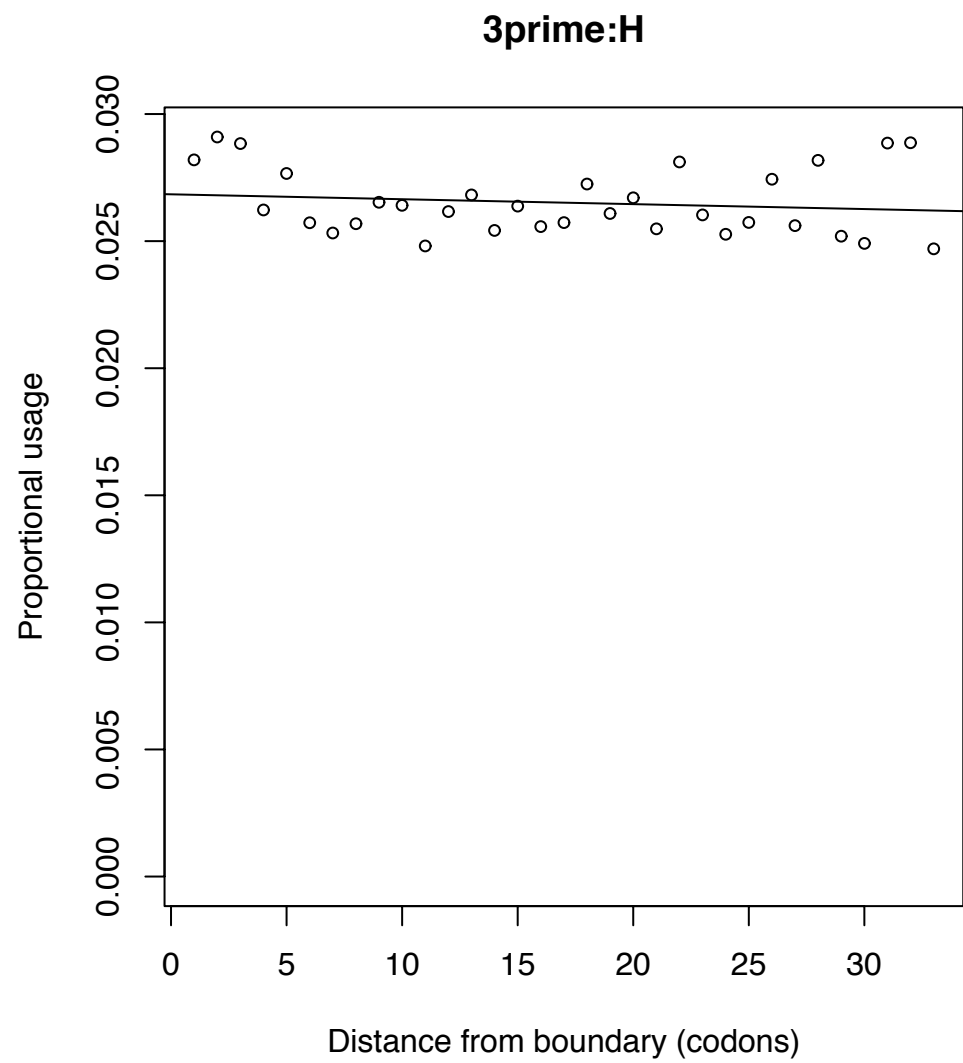

**3prime:l**

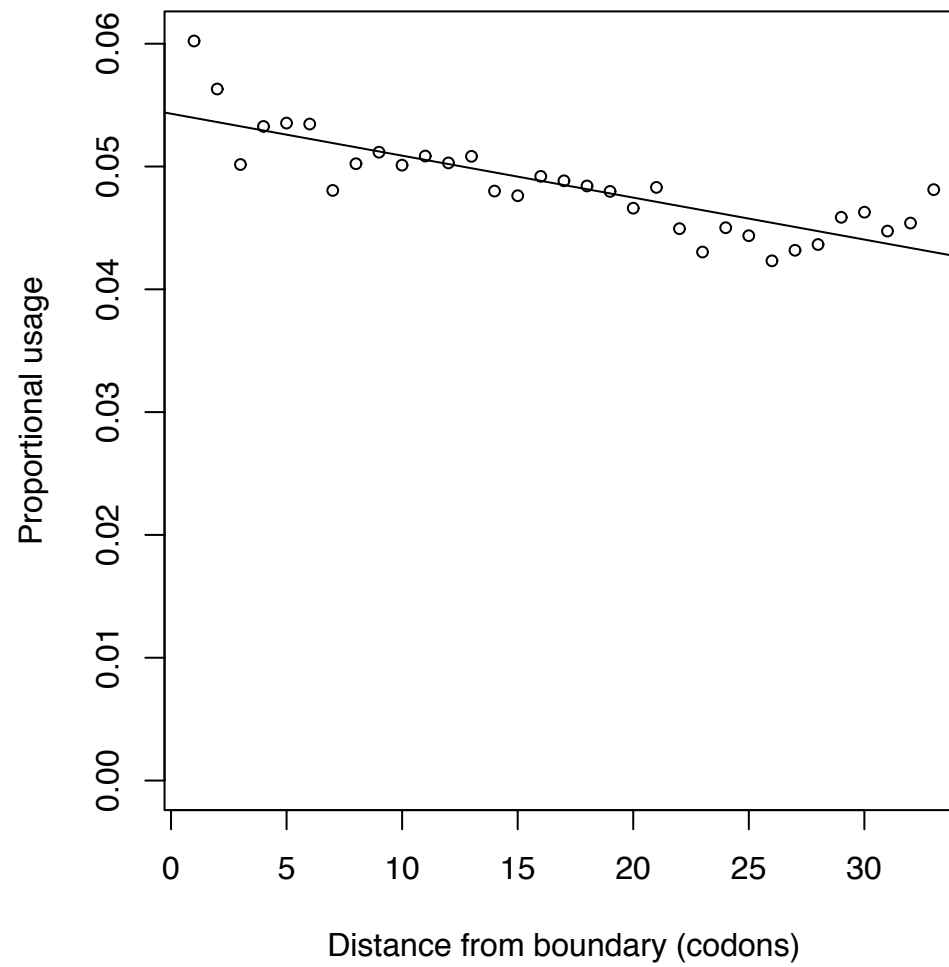

### 3prime:K

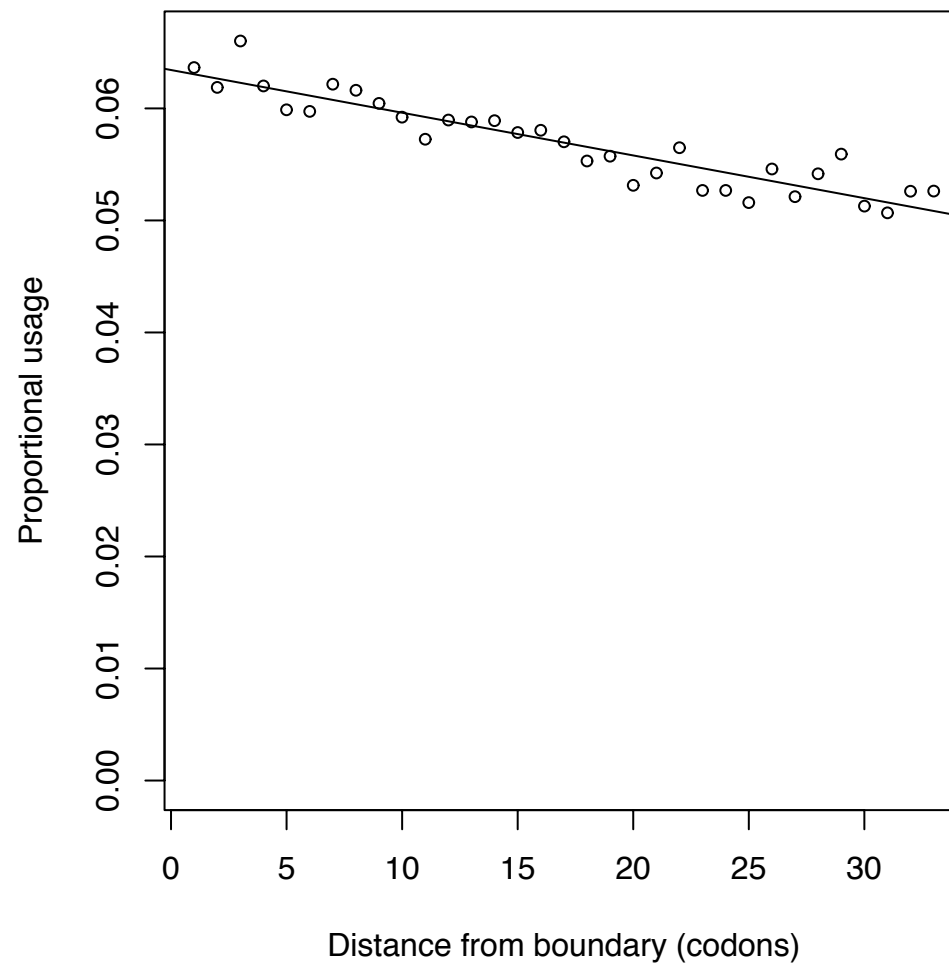

### 3prime:L:2 fold degenerate

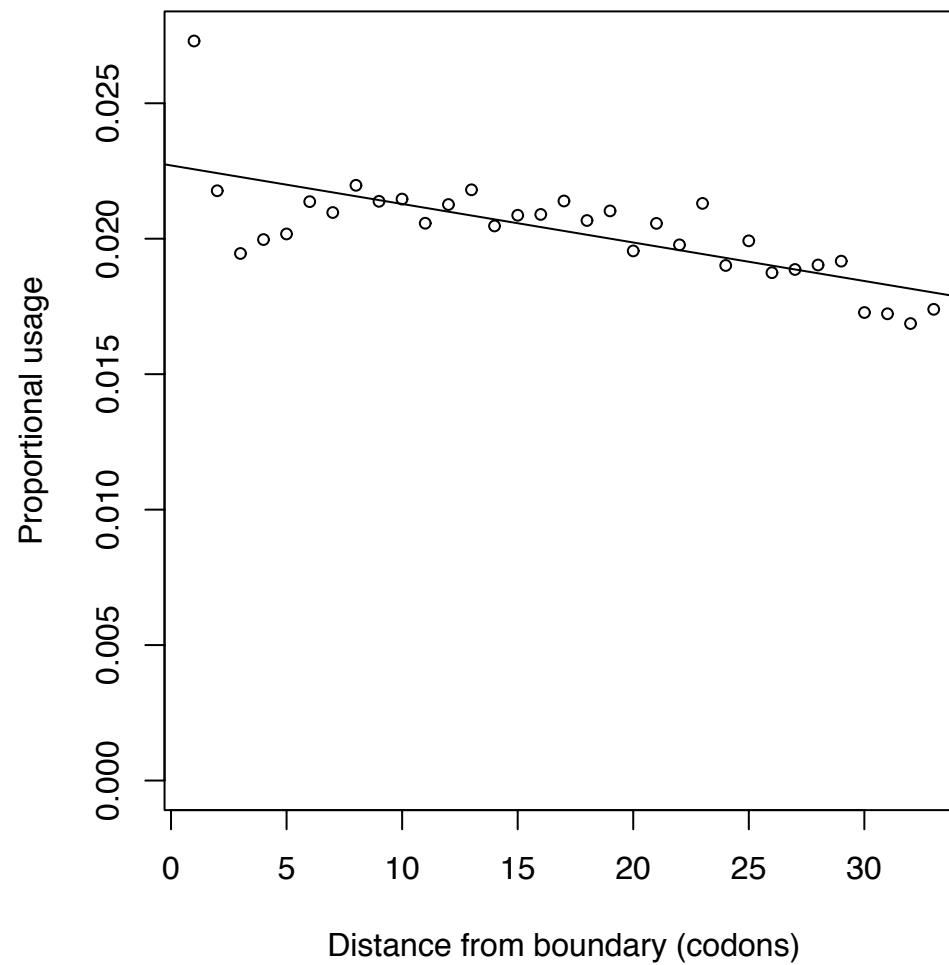

### 3prime:L:4 fold degenerate

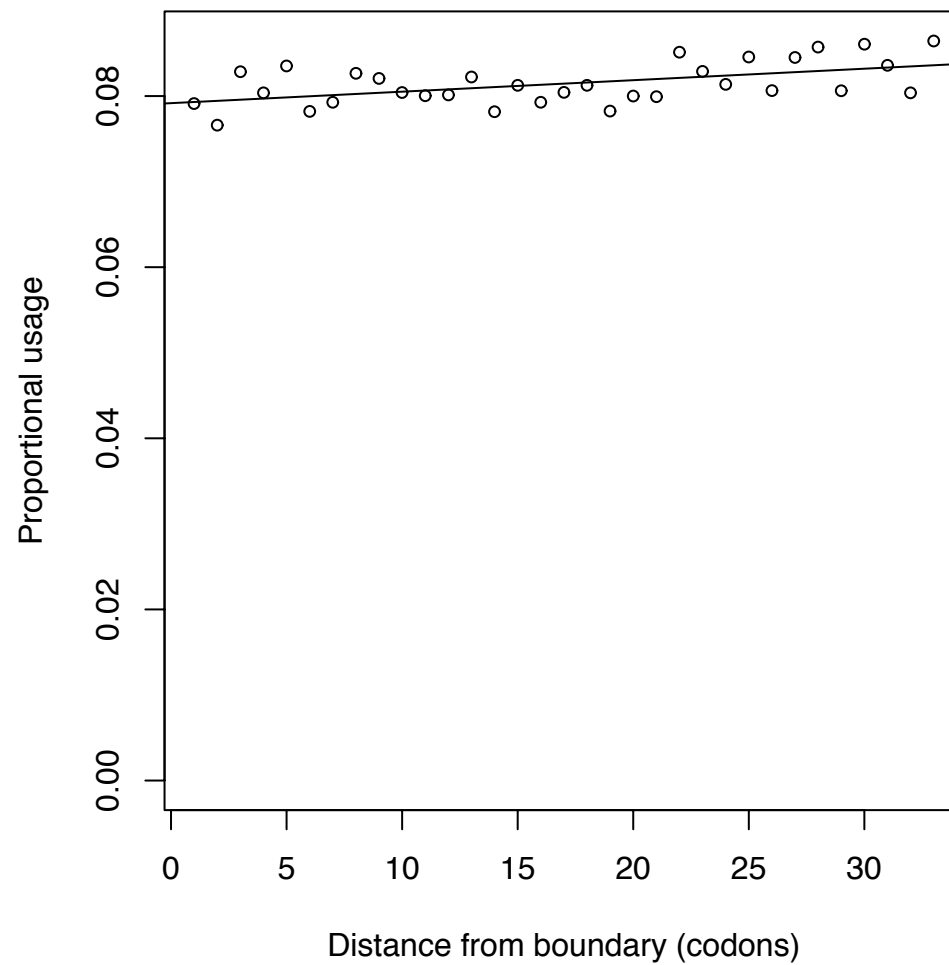

### 3prime:M

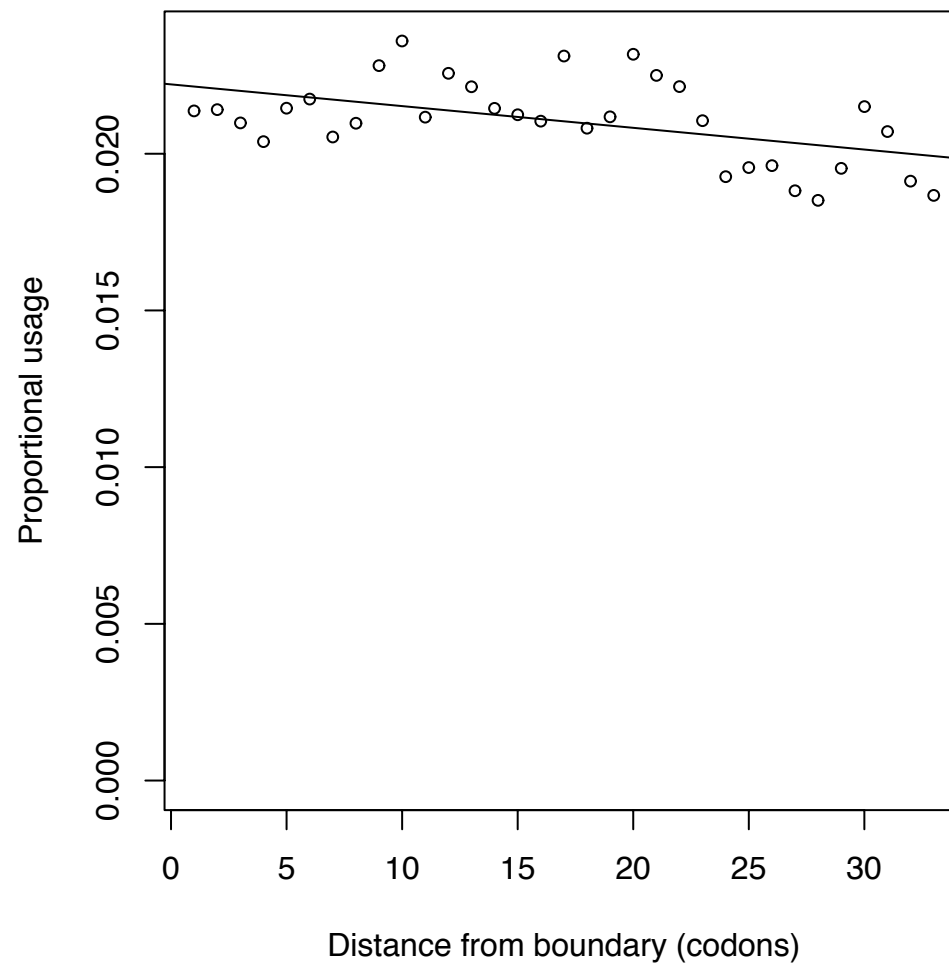

### 3prime:N

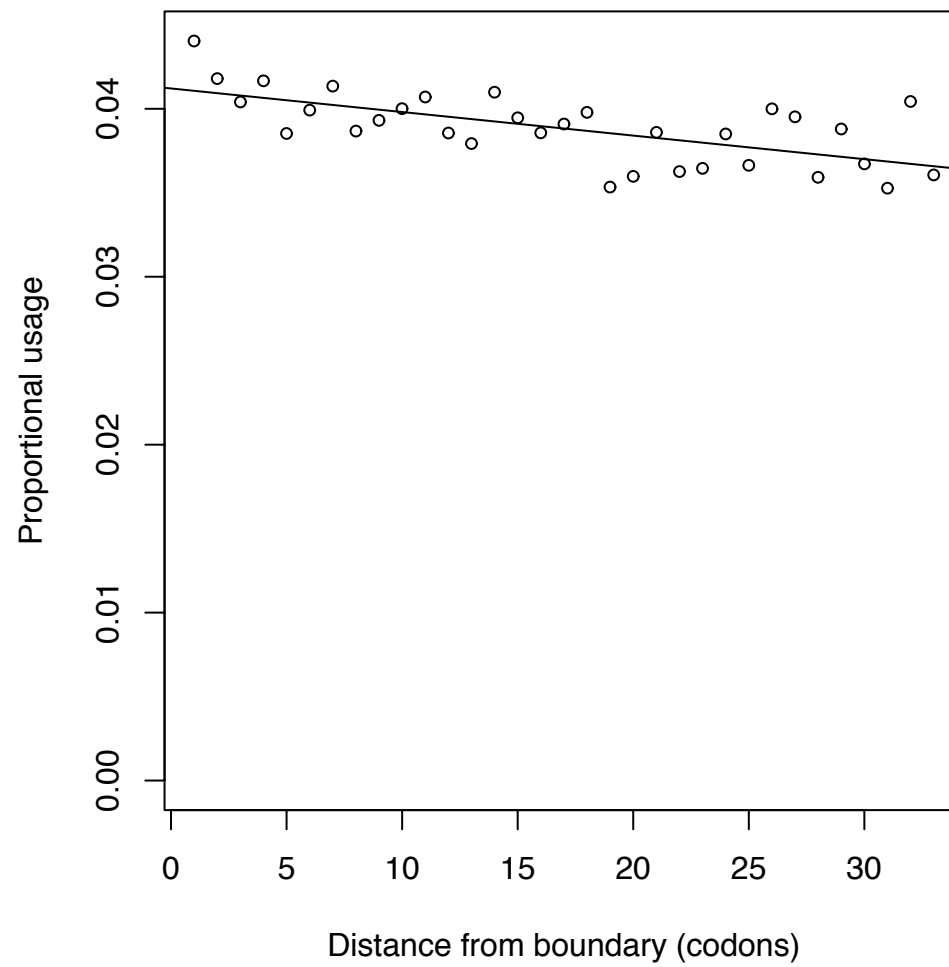

### 3prime:P

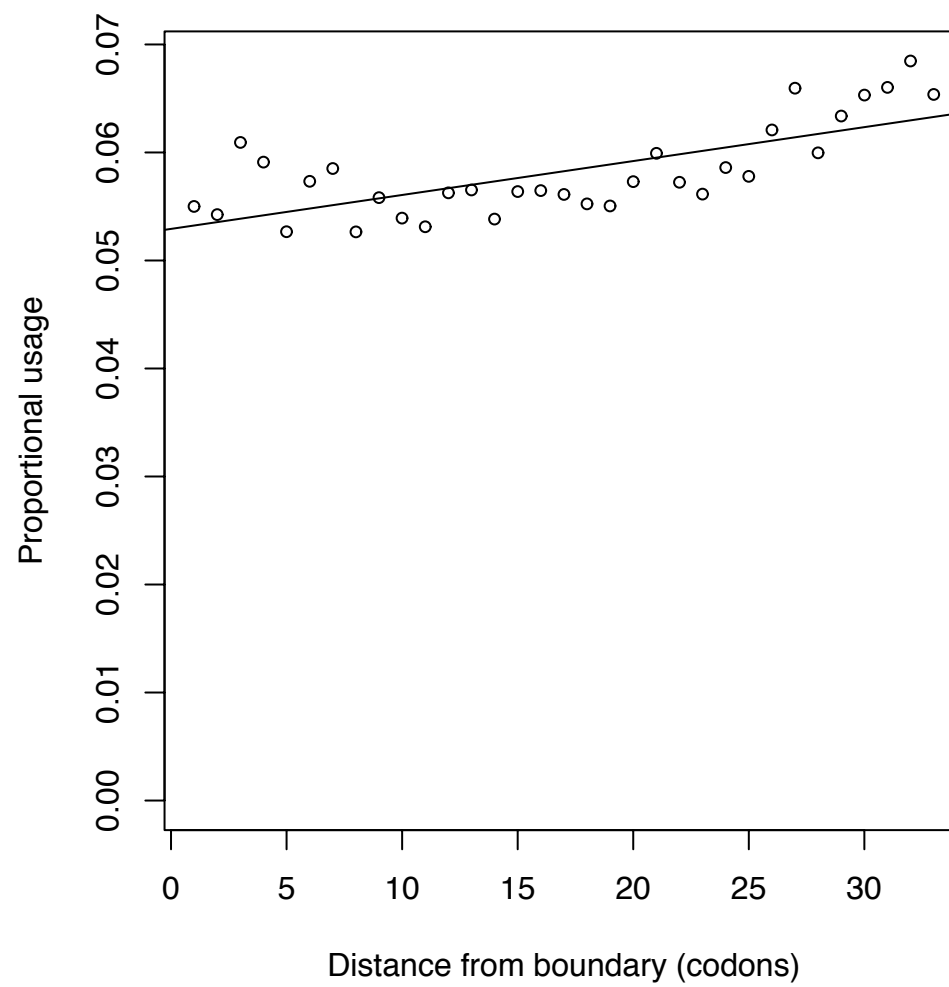

### 3prime:Q

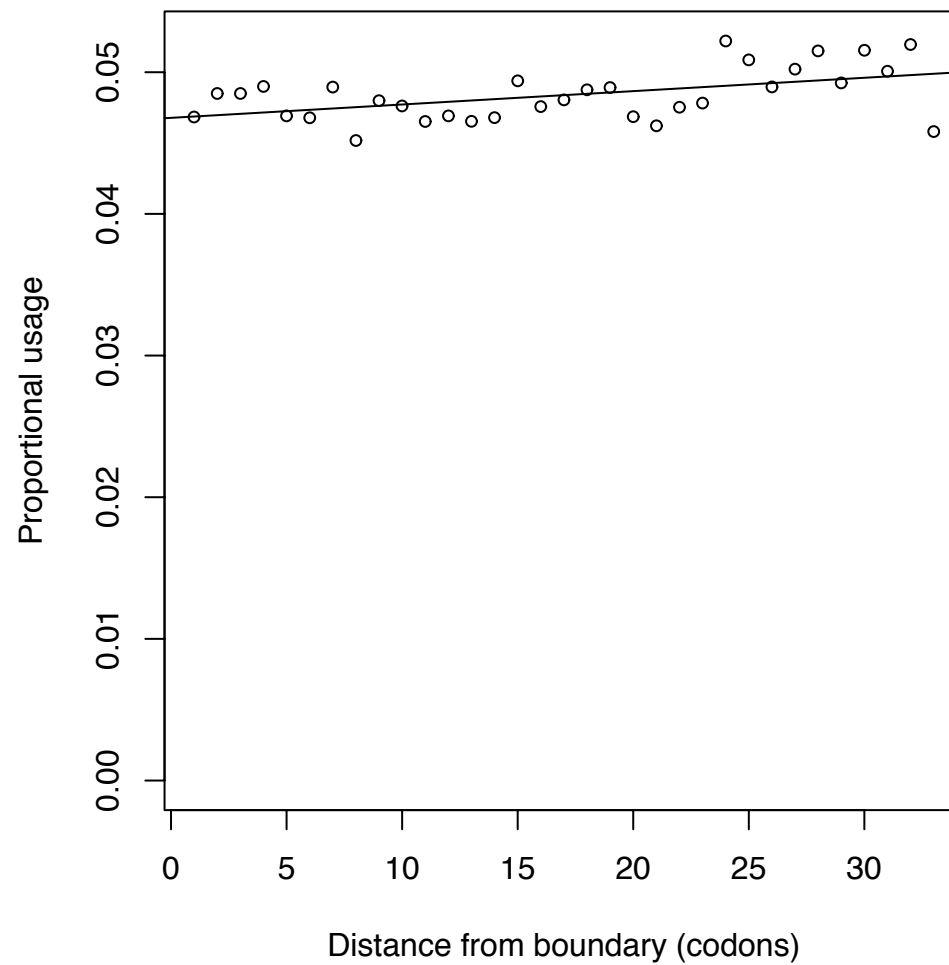

### 3prime:R:2 fold degenerate

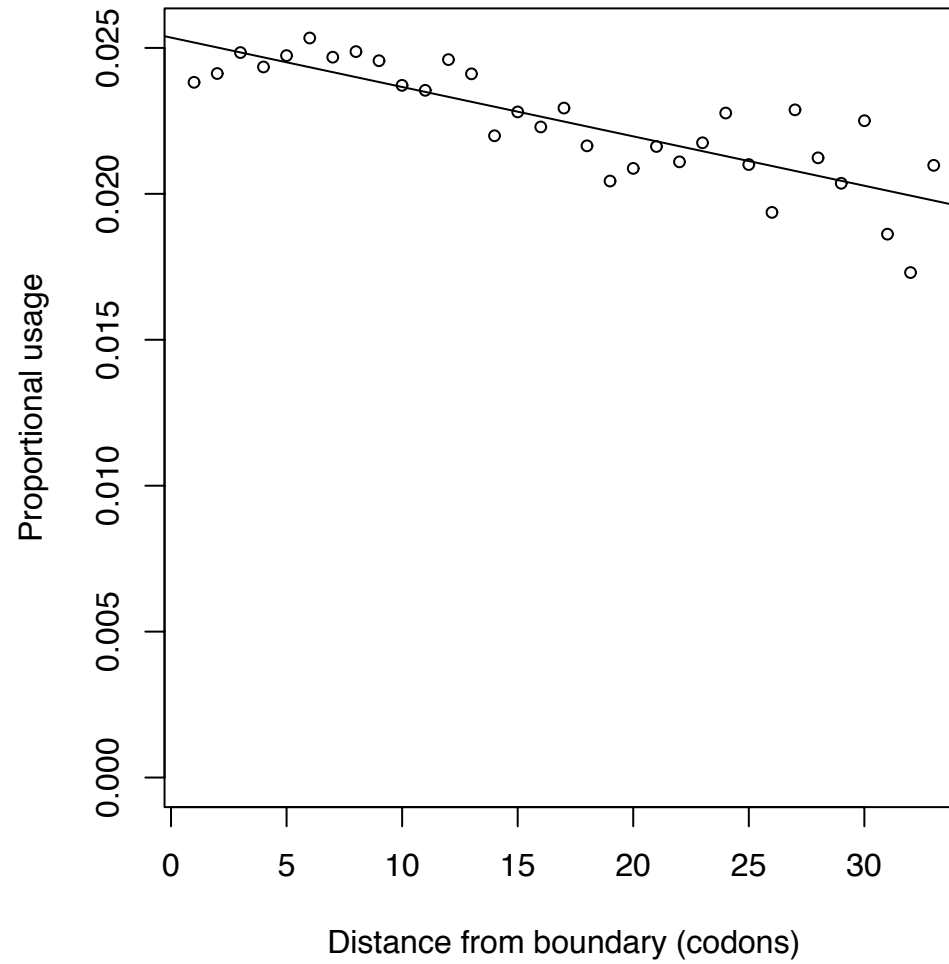

### 3prime:R:4 fold degenerate

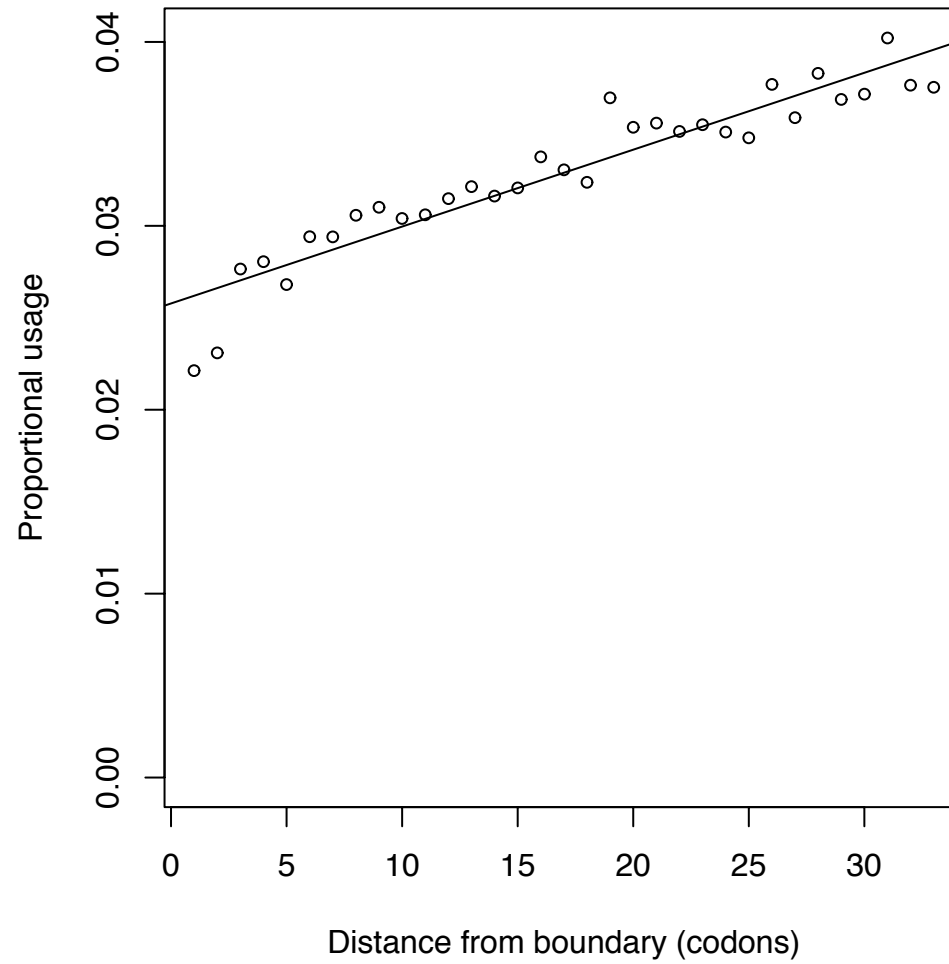

### 3prime:S:2 fold degenerate

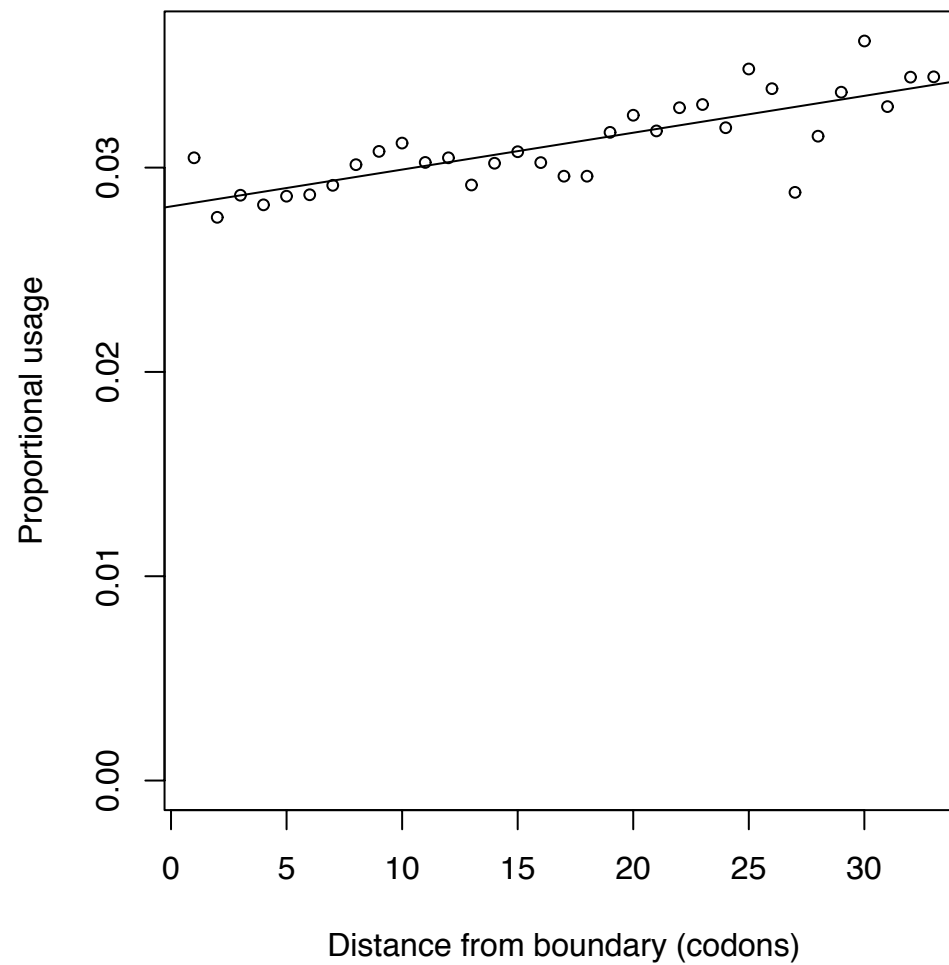

### 3prime:S:4 fold degenerate

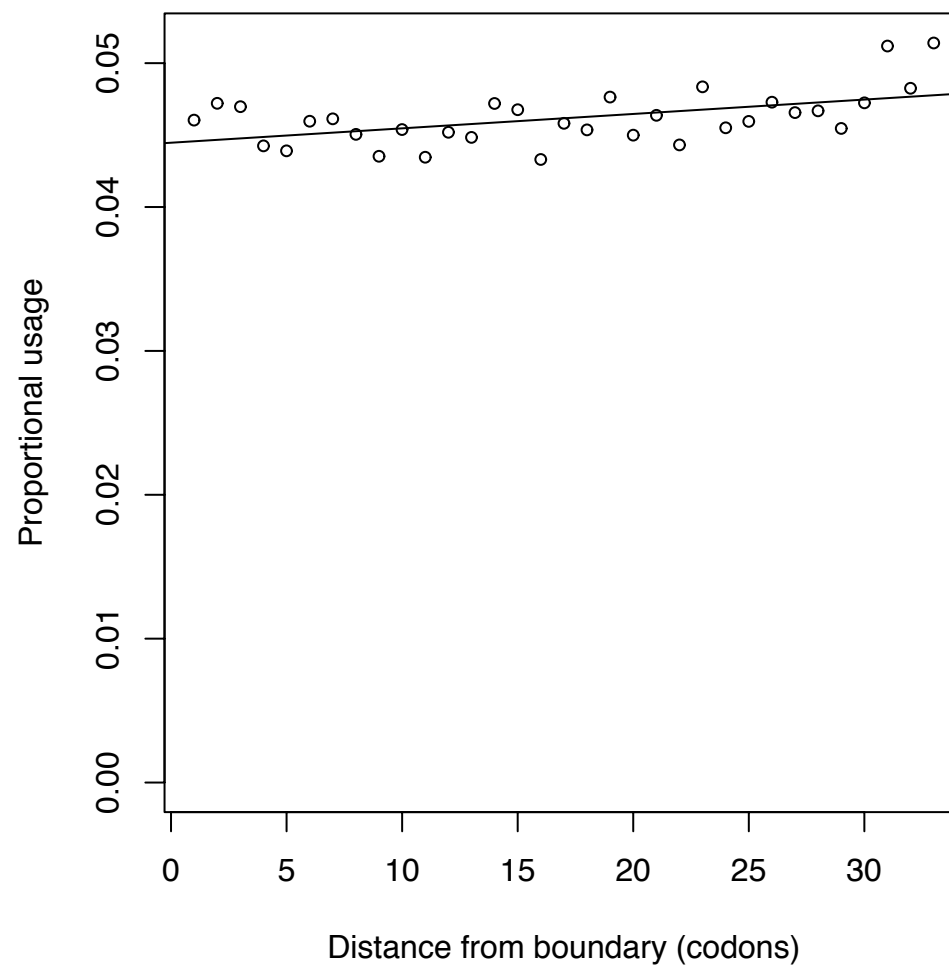

### 3prime:T

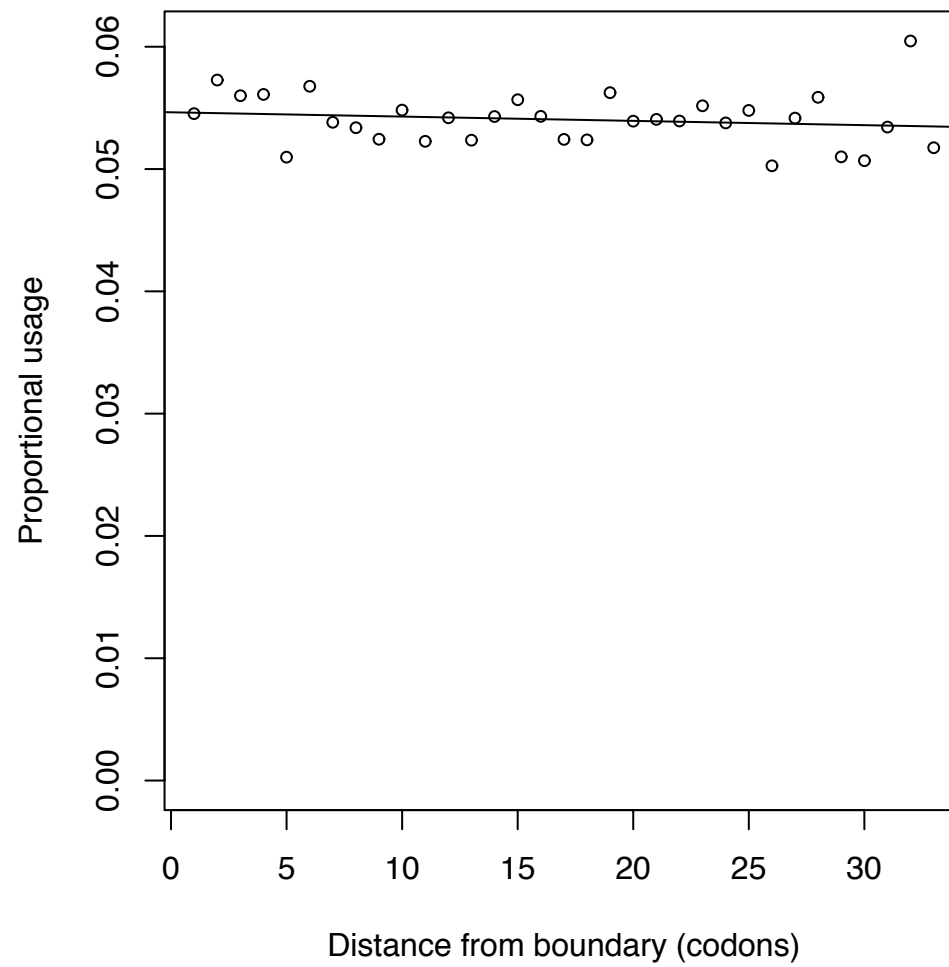

### 3prime:V

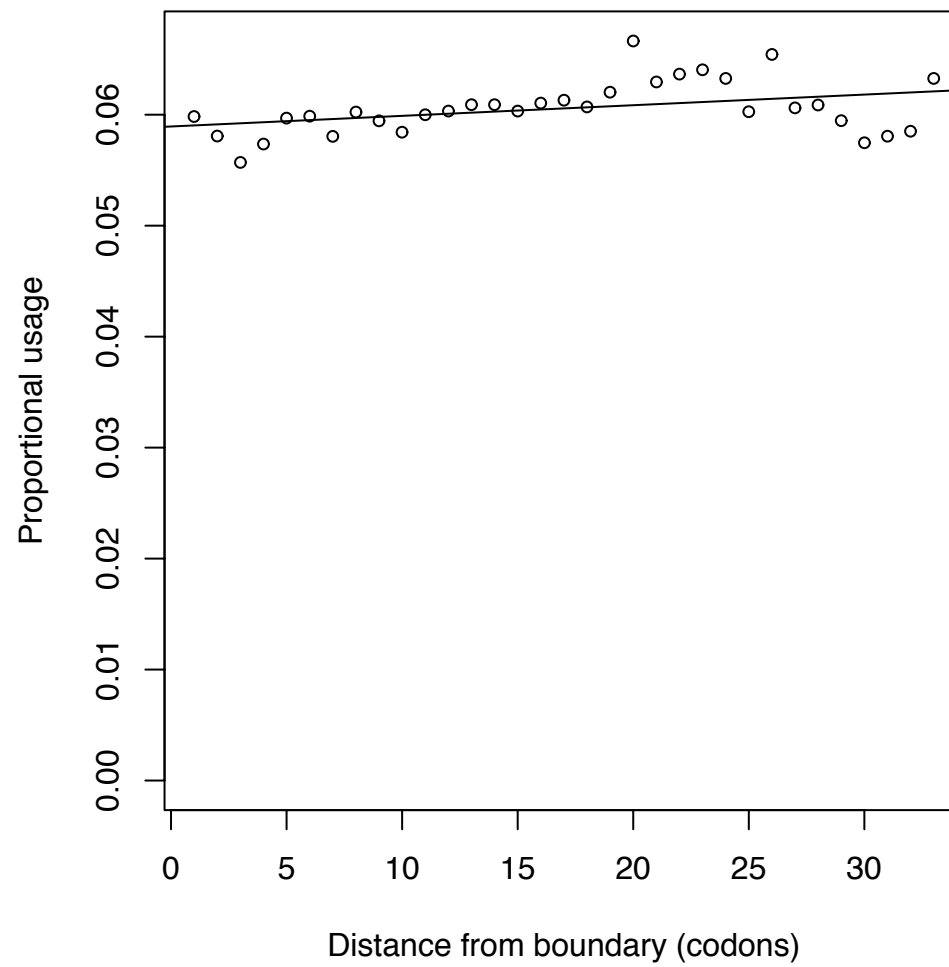

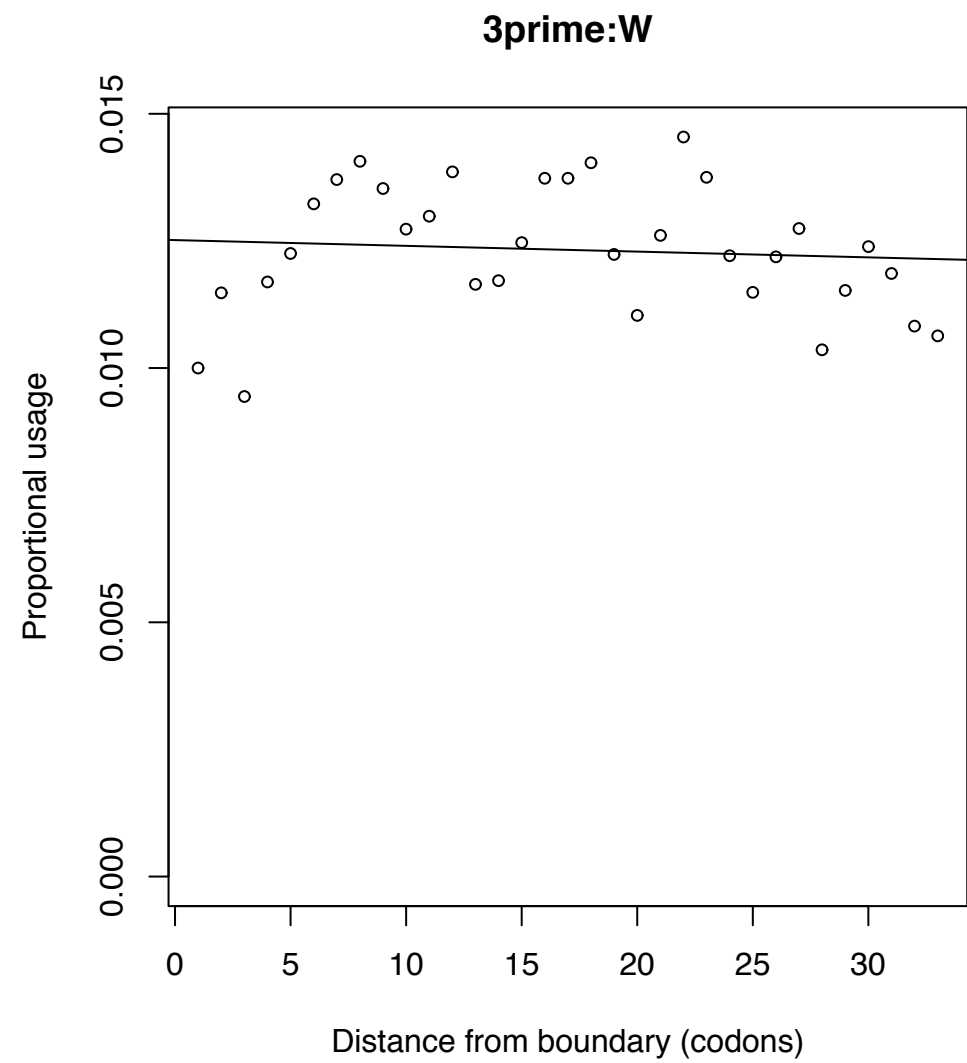

### 3prime:Y

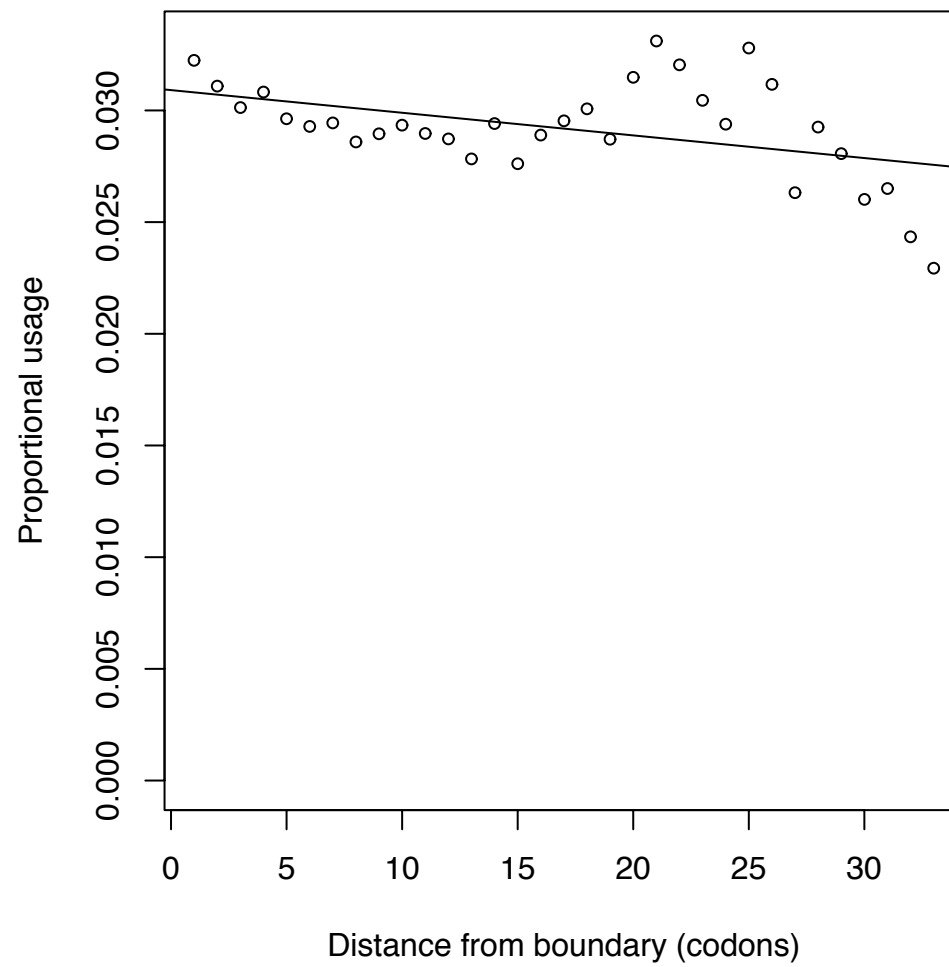

### 5prime:A

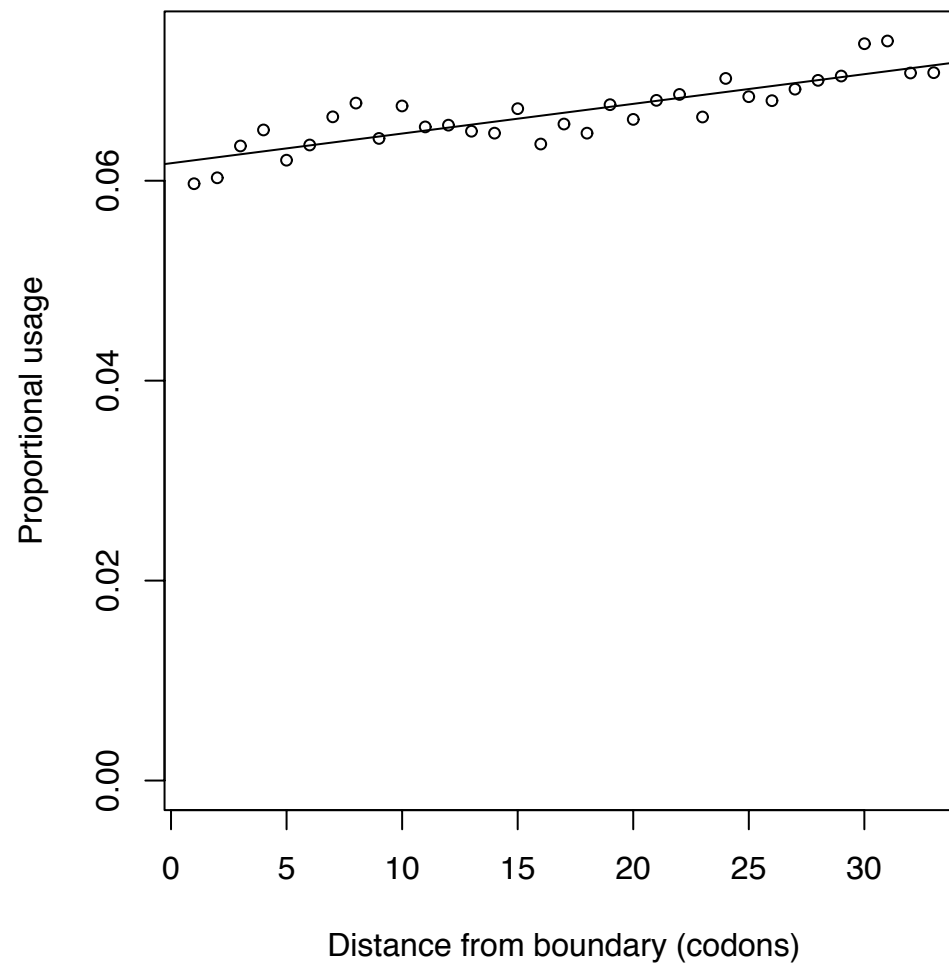

### 5prime:C

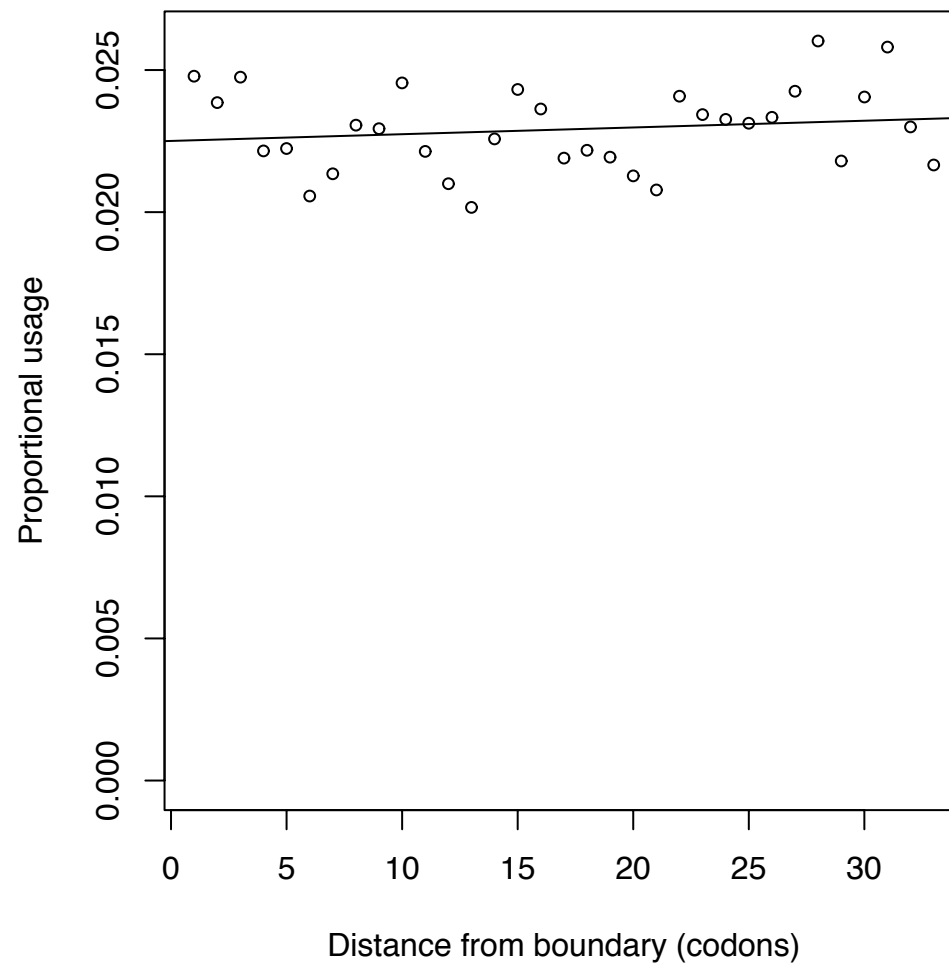

### 5prime:D

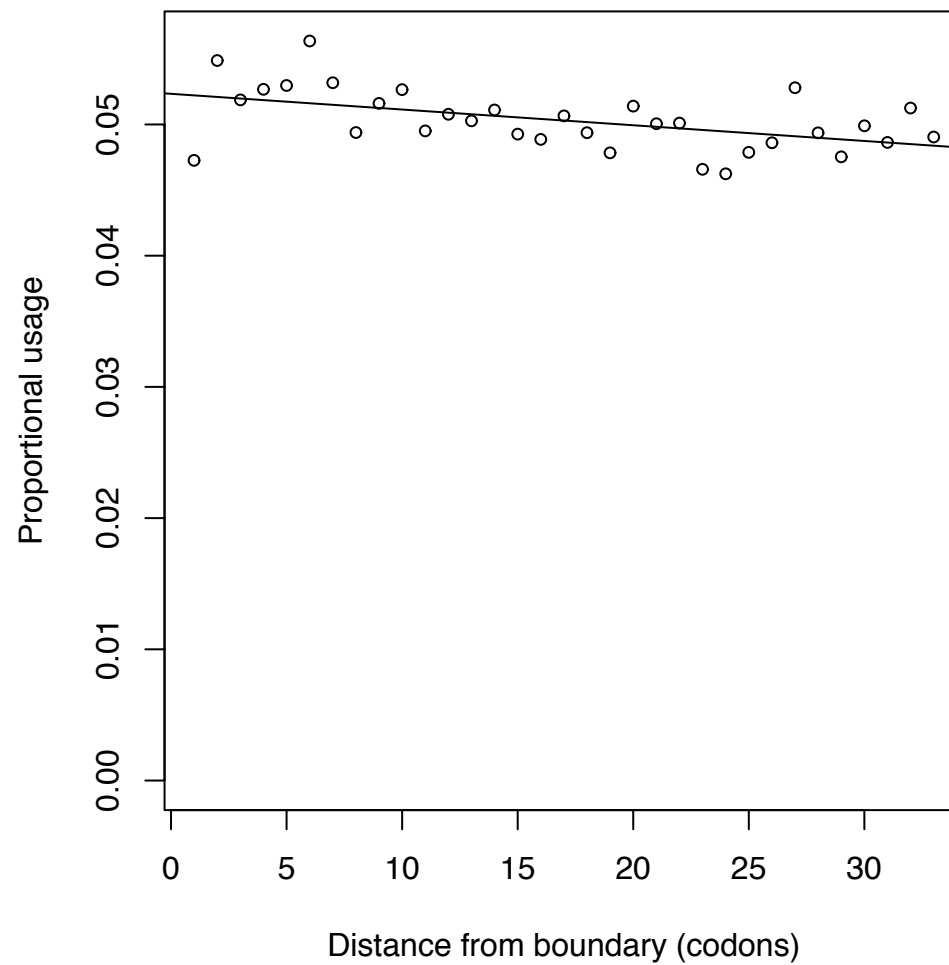

### 5prime:E

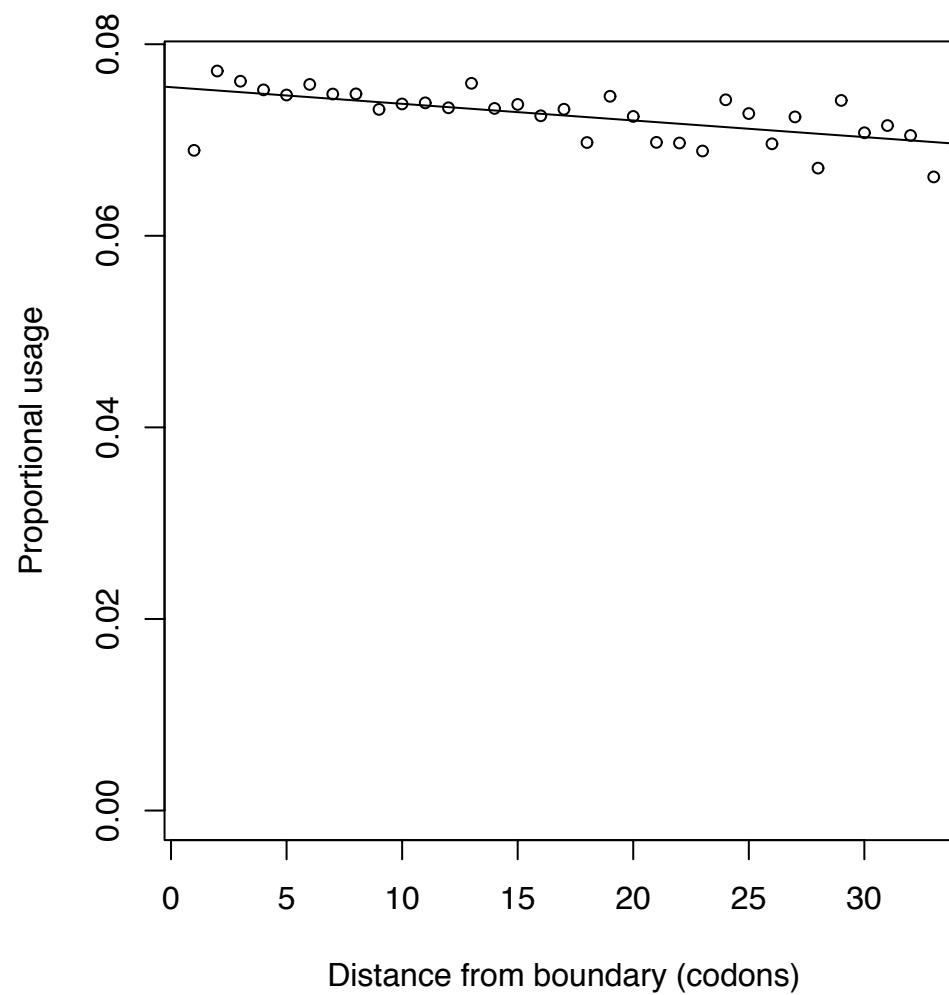

### 5prime:F

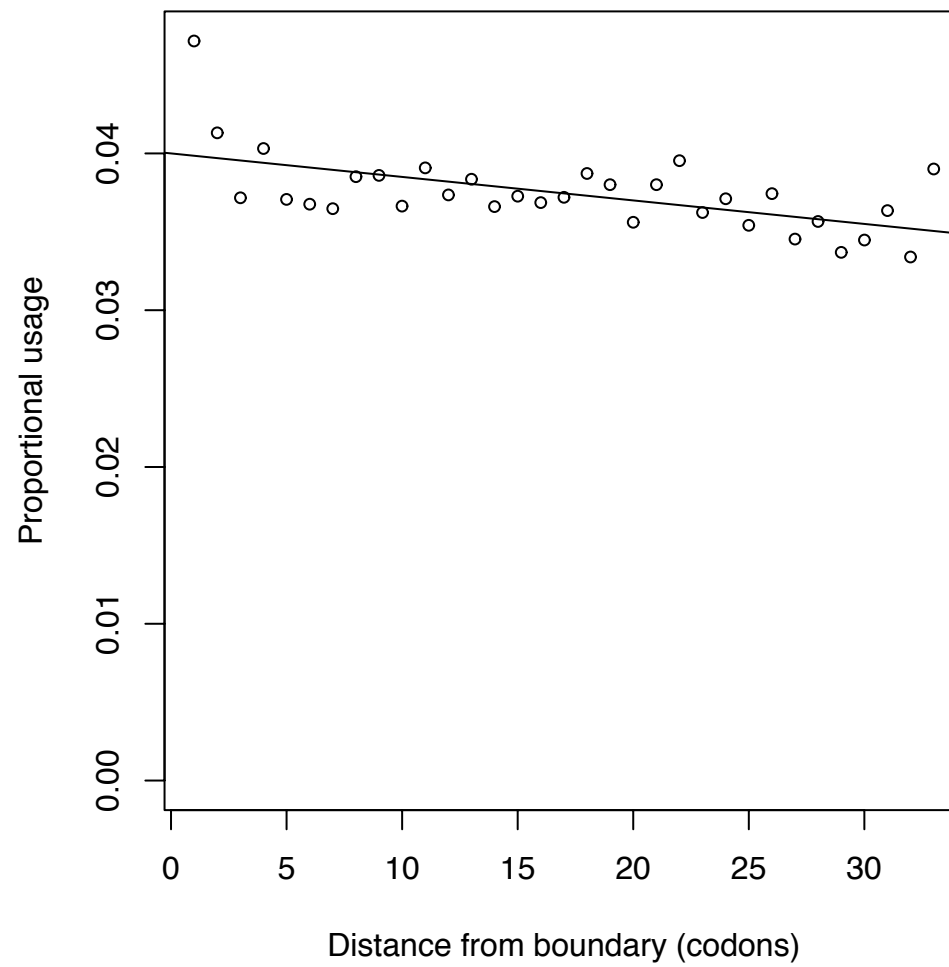

### 5prime:G

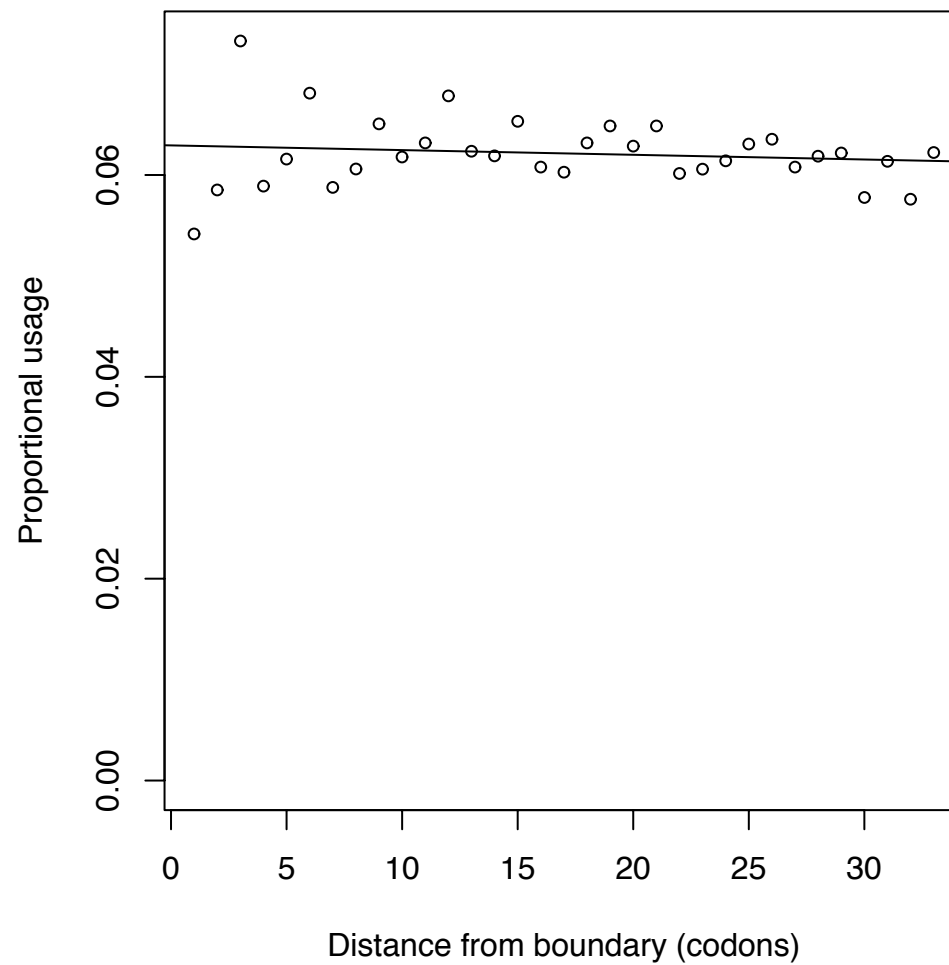

# 5prime:H

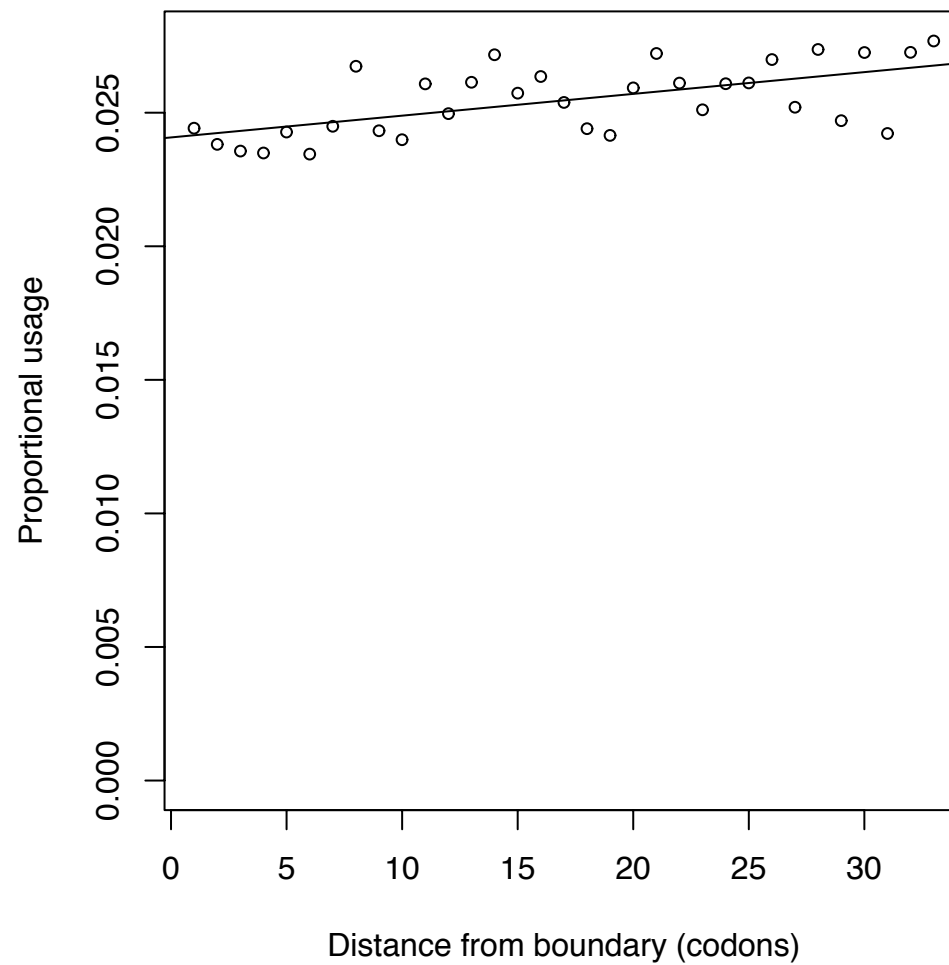

**5prime:l**

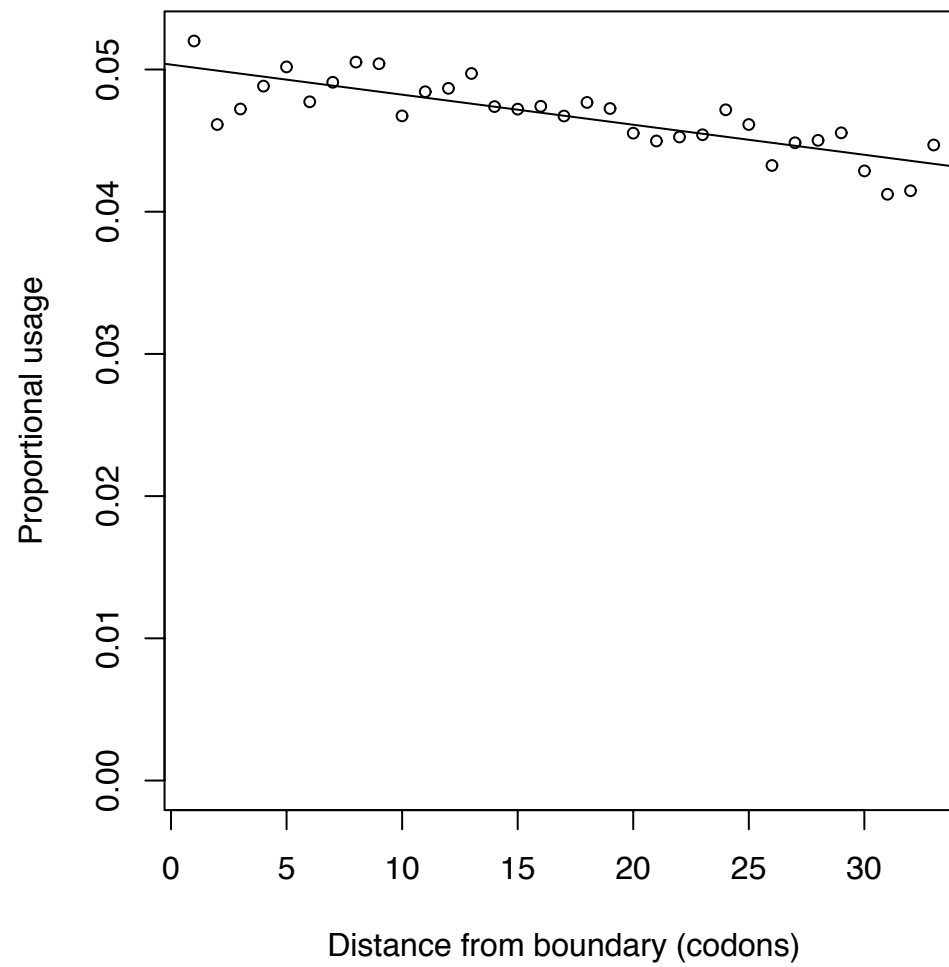

# 5prime:K

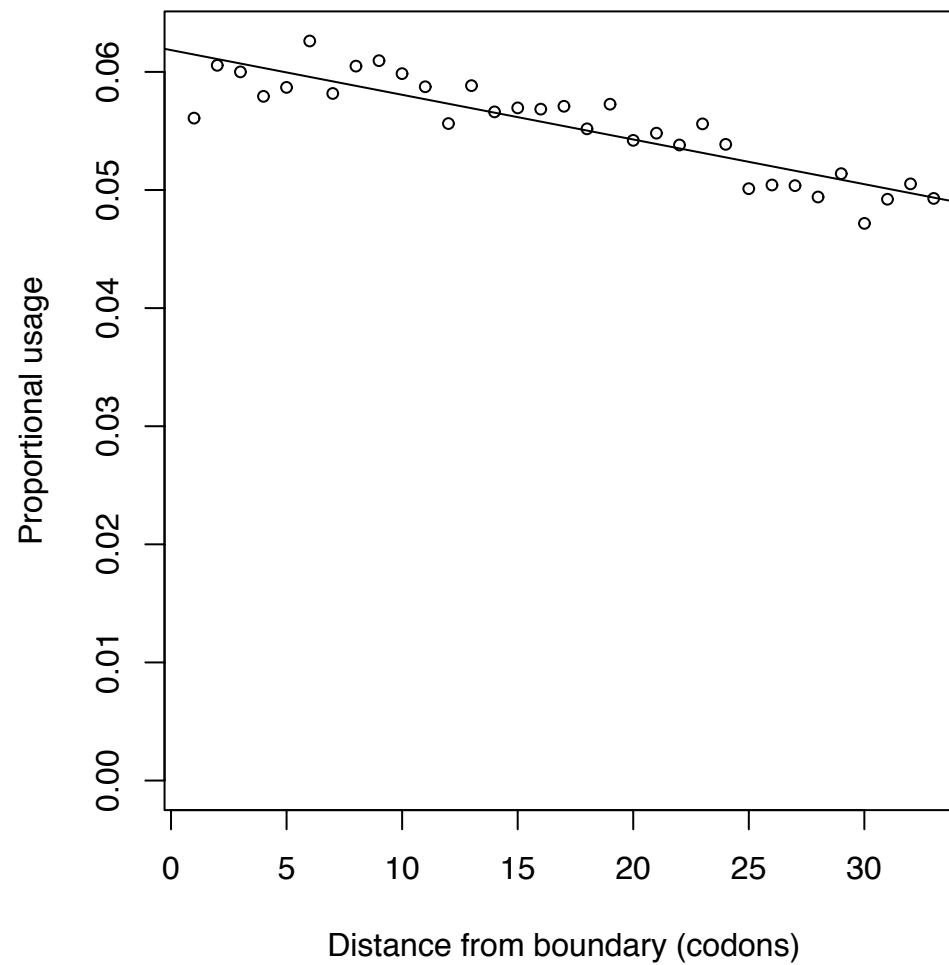

### 5prime:L:2 fold degenerate

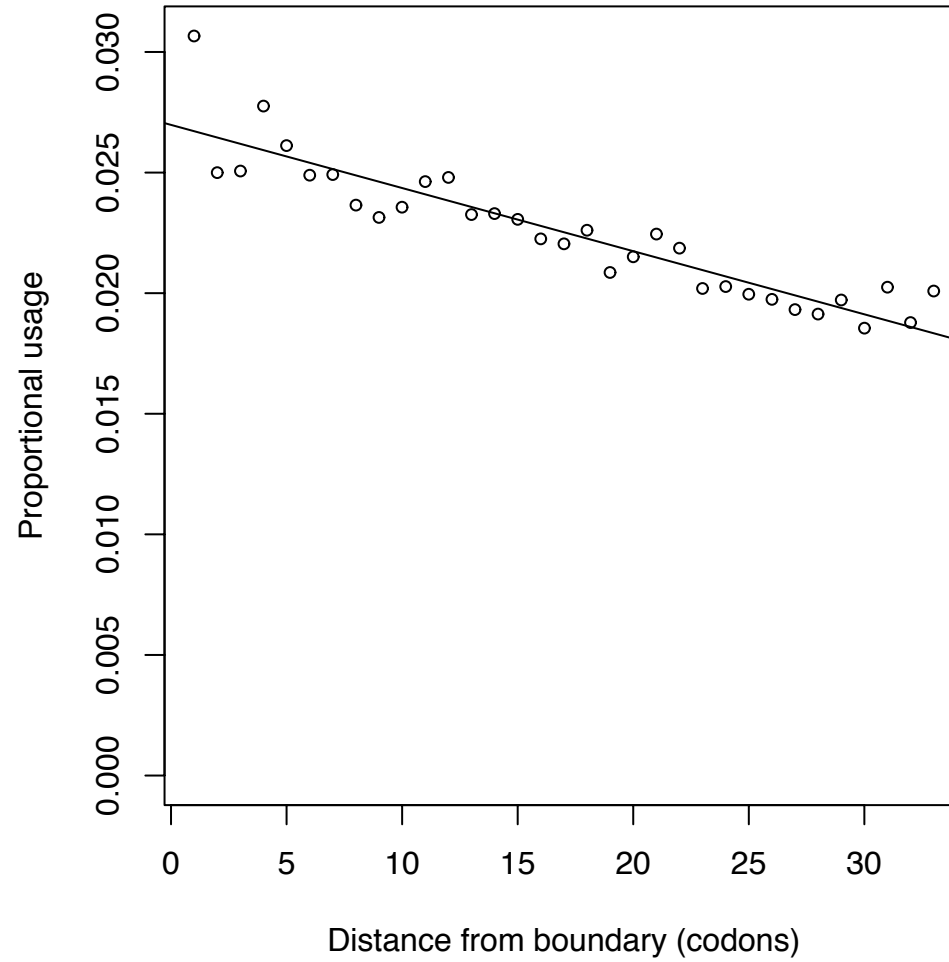

### 5prime:L:4 fold degenerate

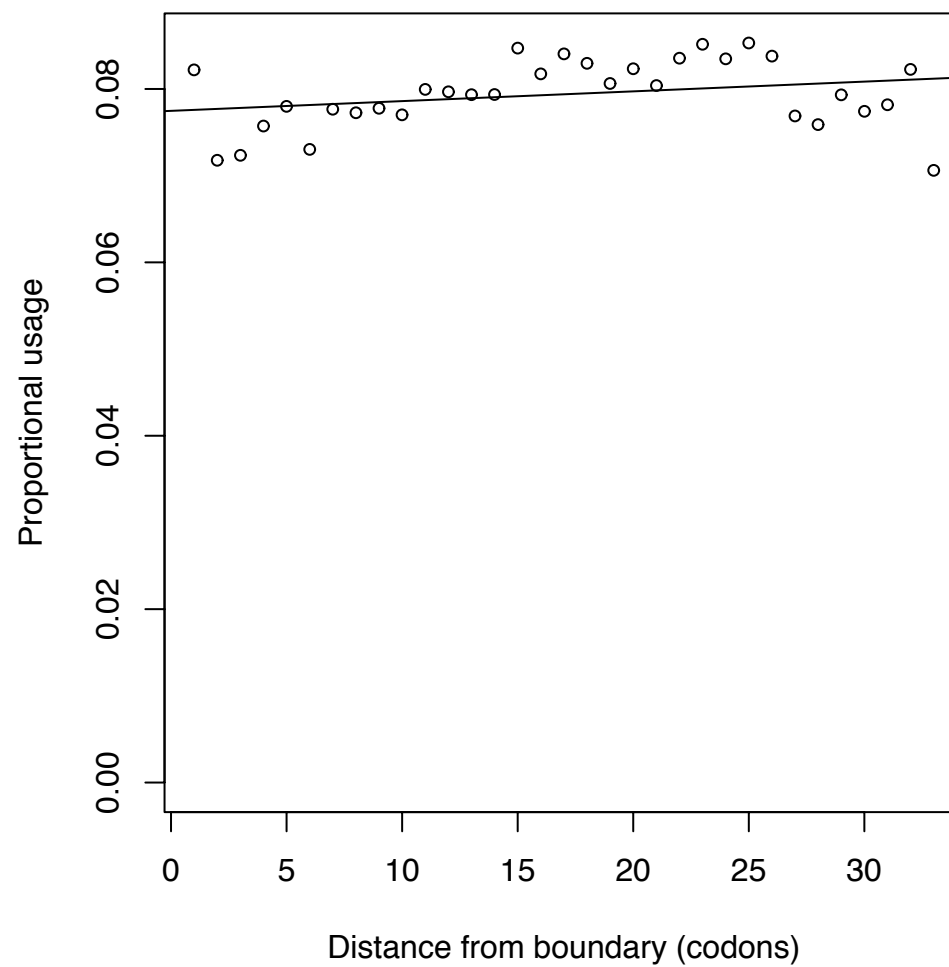

# 5prime:M

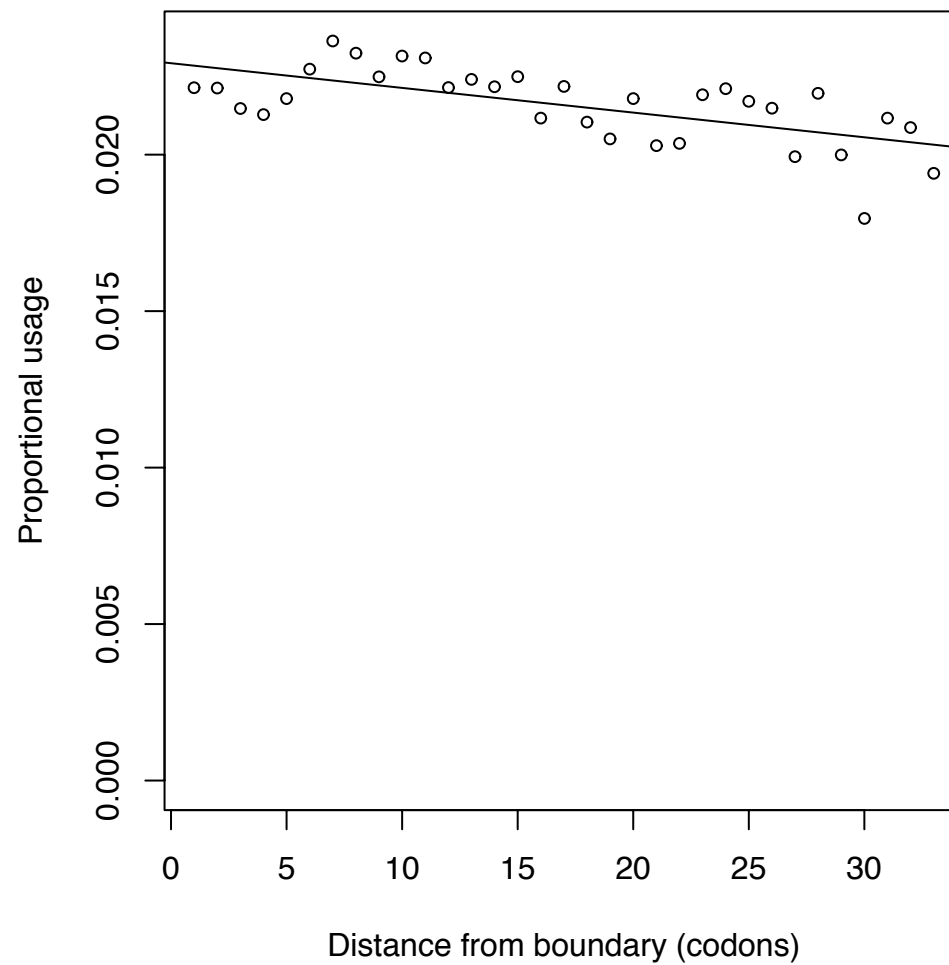

# 5prime:N

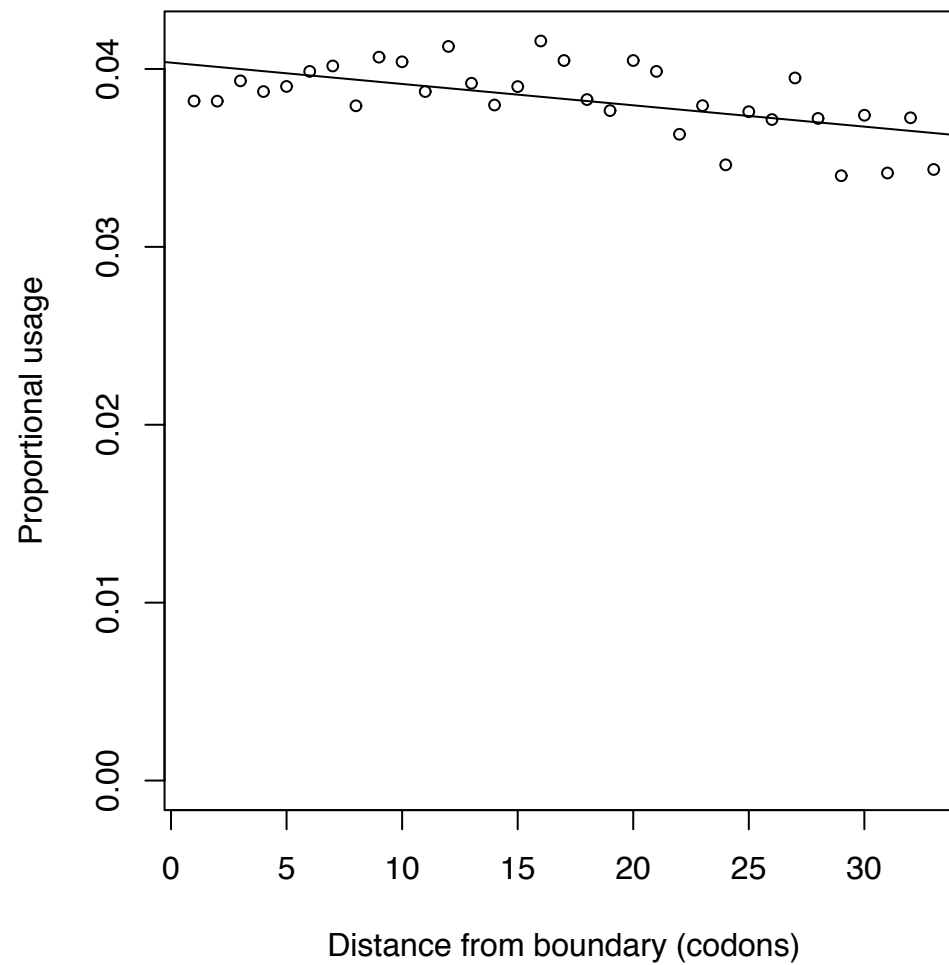

# 5prime:P

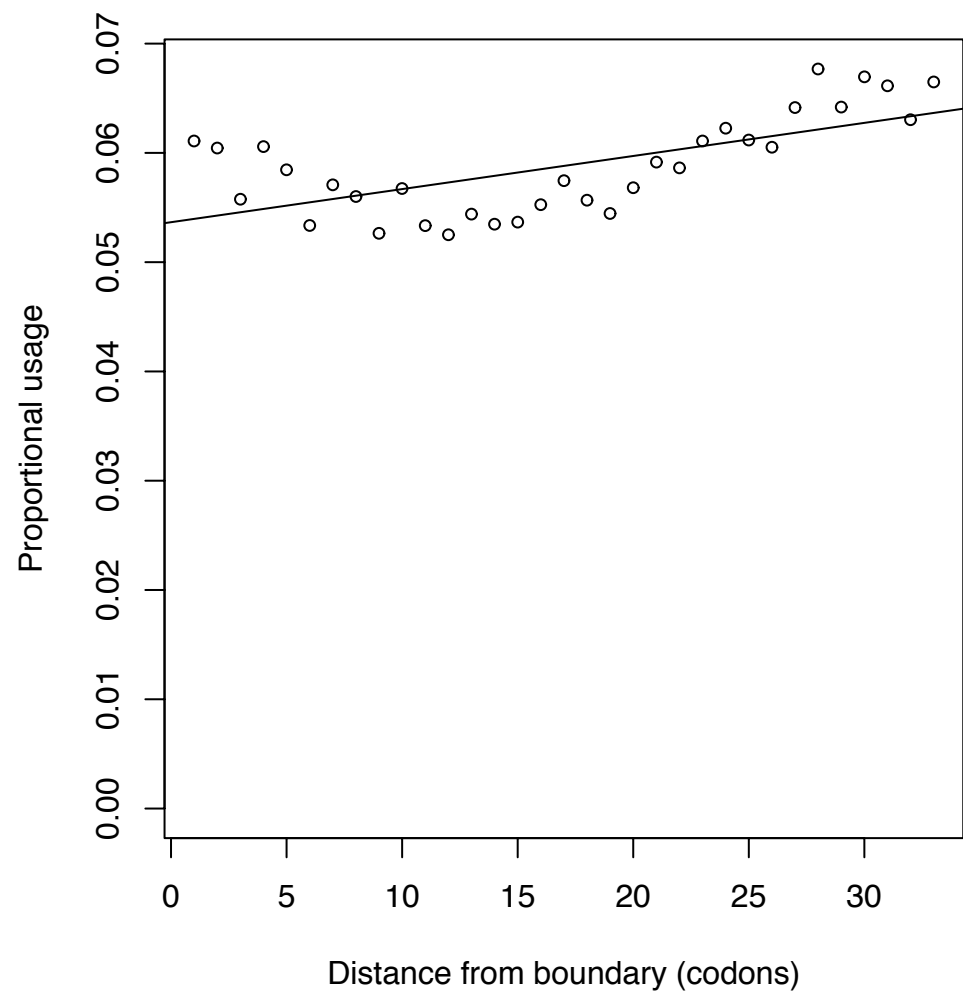

# 5prime:Q

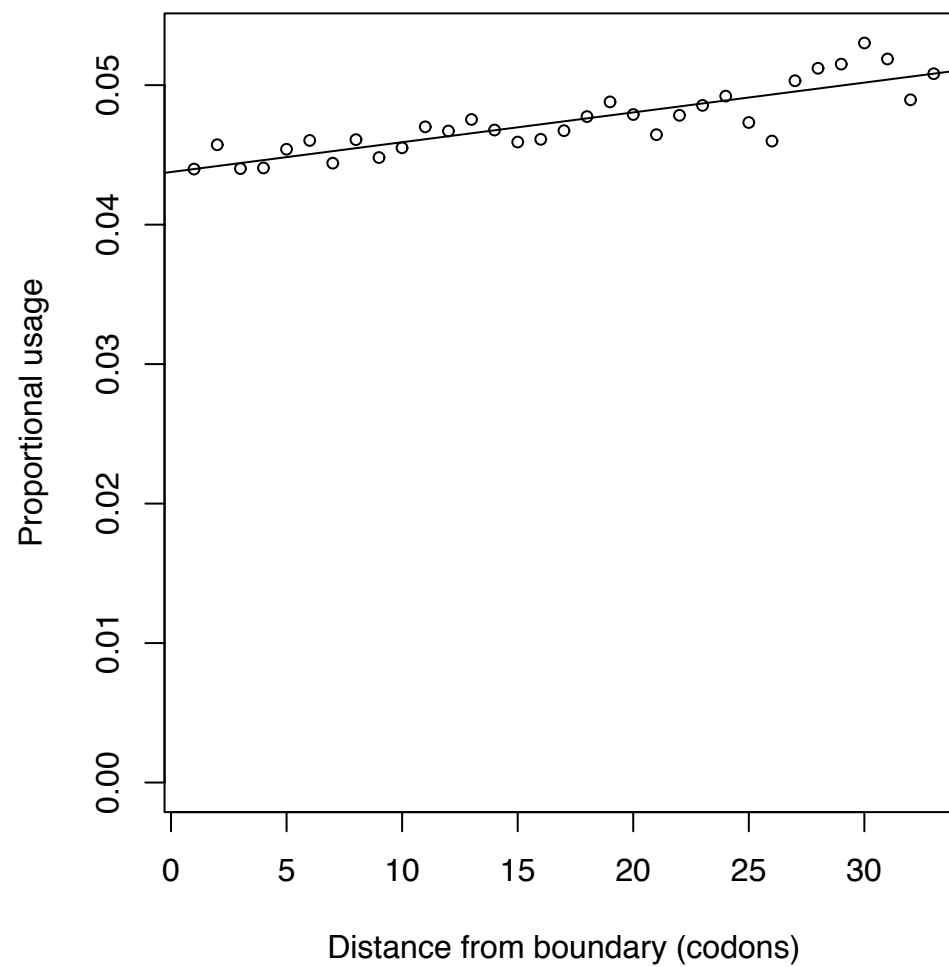

### 5prime:R:2 fold degenerate

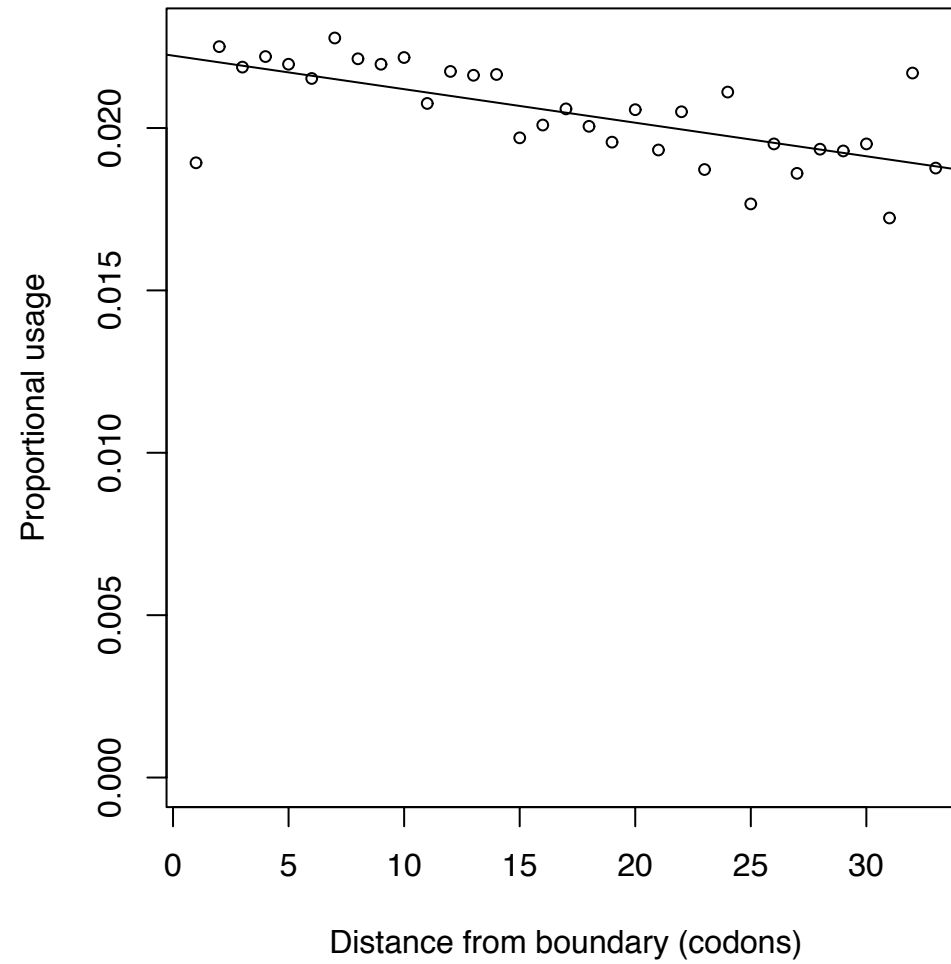

### 5prime:R:4 fold degenerate

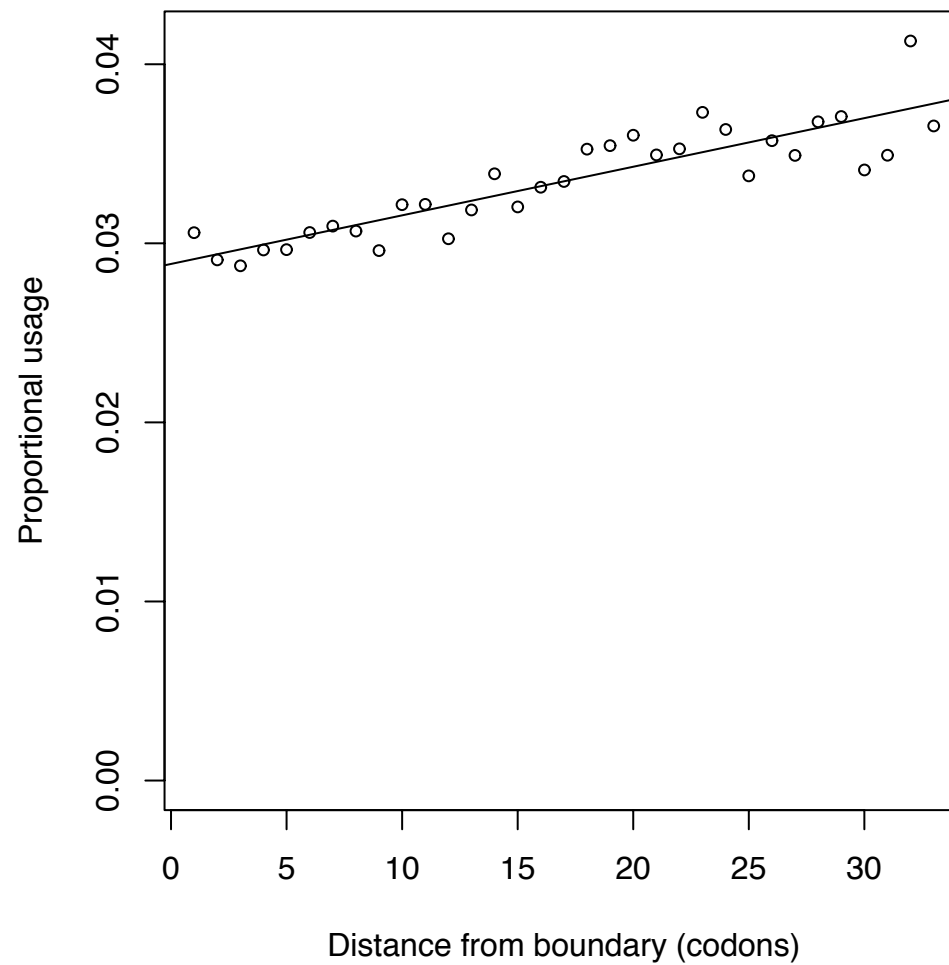

### 5prime:S:2 fold degenerate

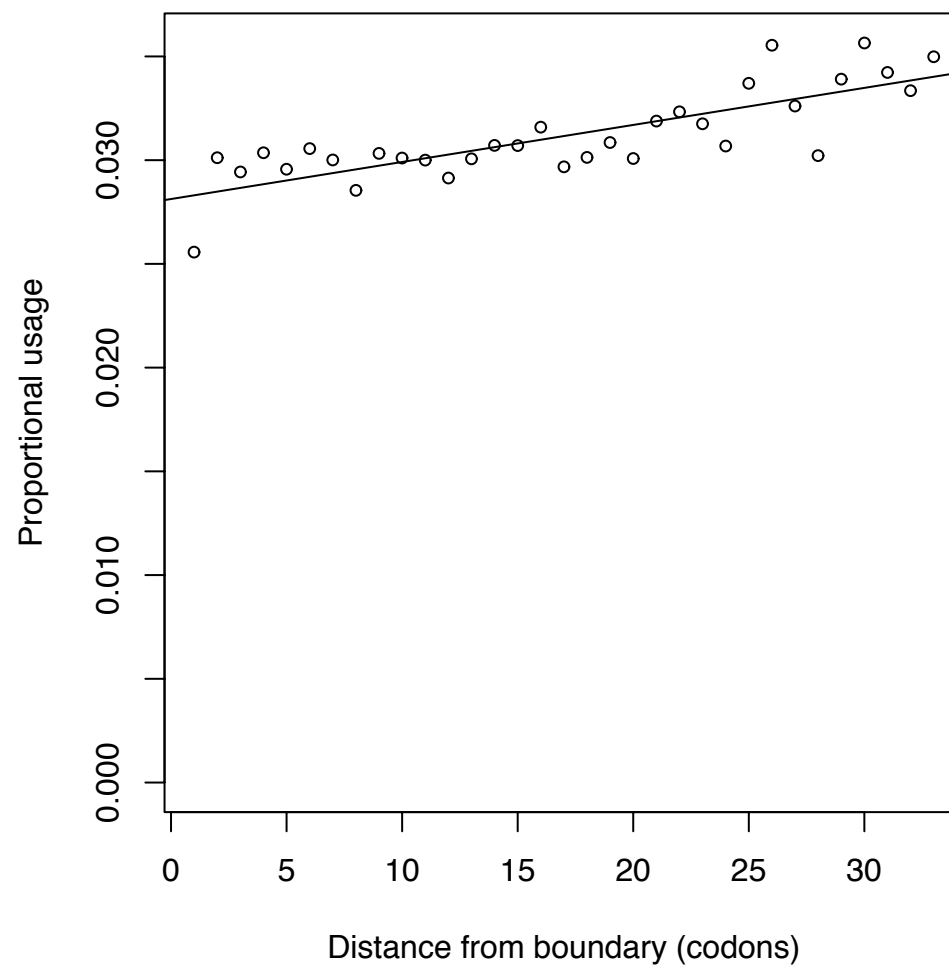

### 5prime:S:4 fold degenerate

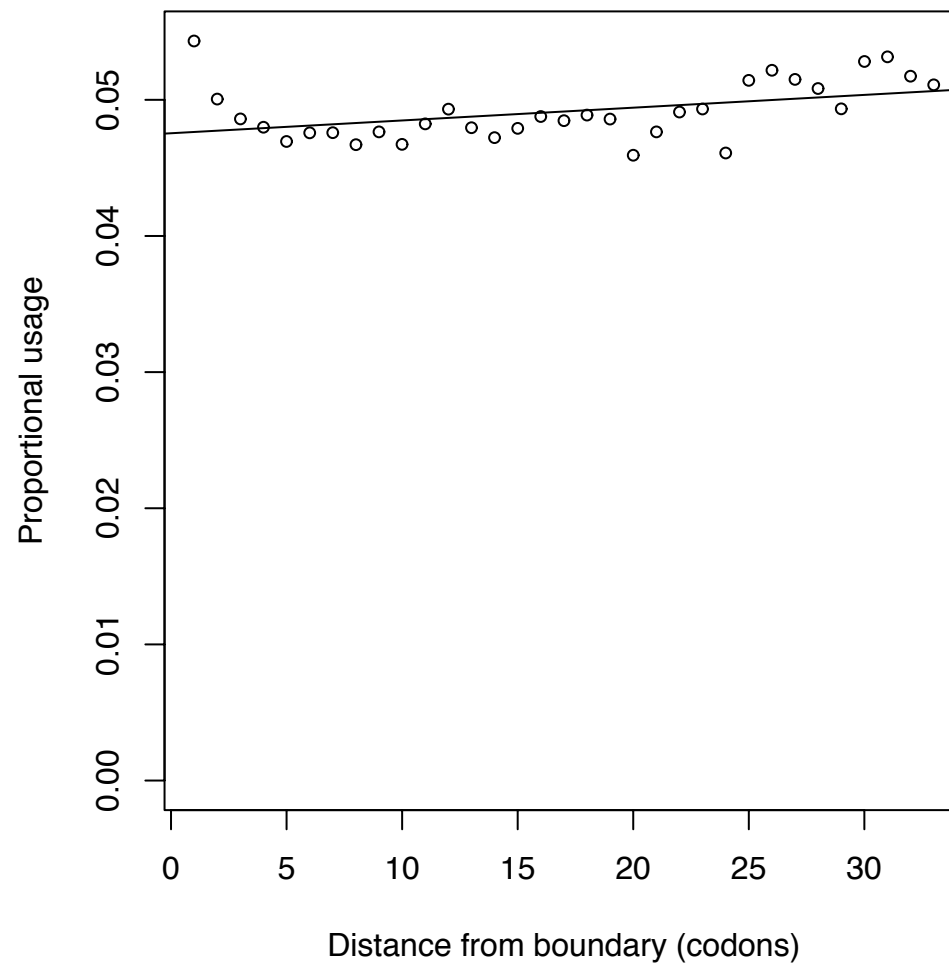

# 5prime:T

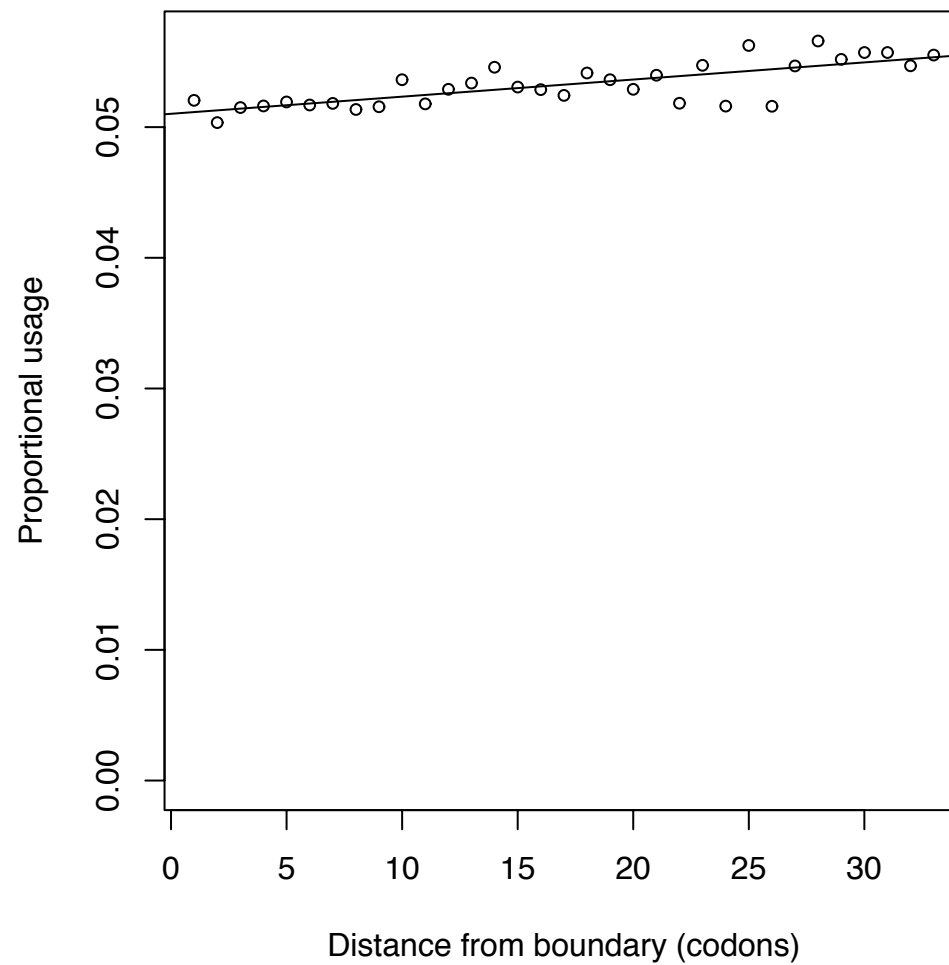

### 5prime:V

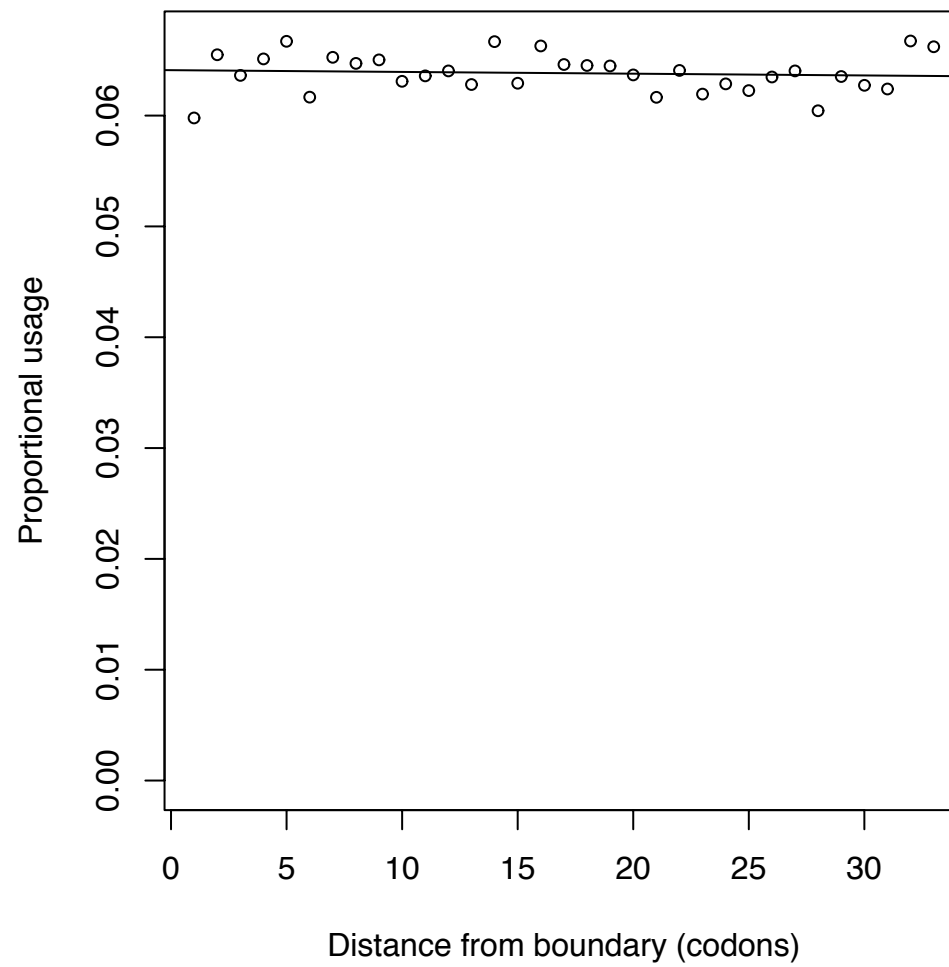

### 5prime:W

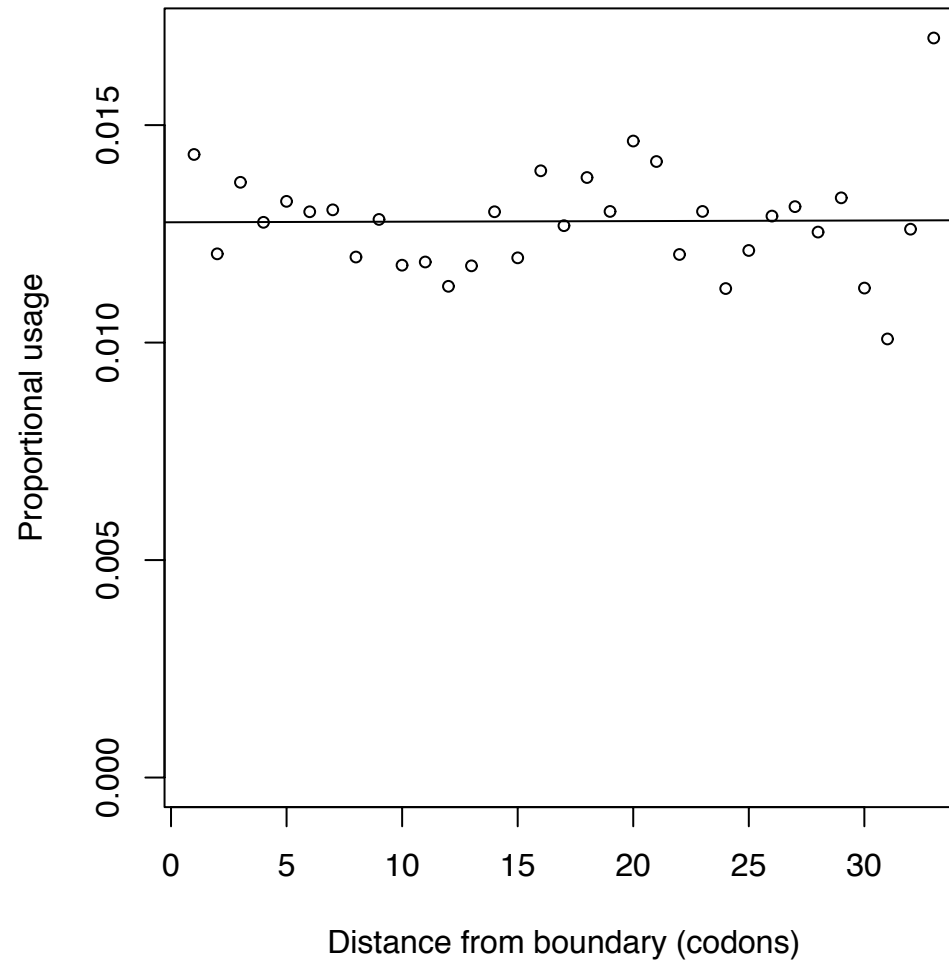

### 5prime:Y

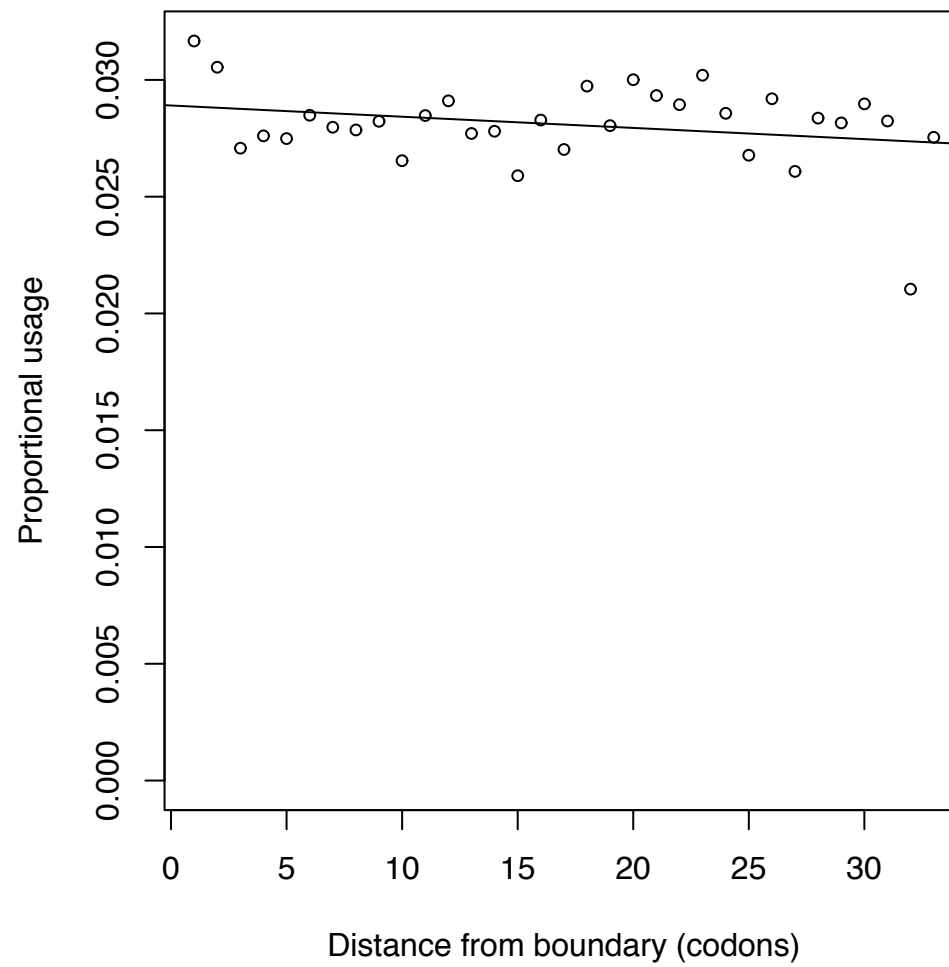

Supplement: pbio.0050014.sg001.pdf [file pbio.0050014.sg001.pdf]
